# Supplementary material for: Nickel-catalyzed cascade carbonylative synthesis of N-benzoyl indoles from 2-nitroalkynes and aryl iodides
Source: Royal Society of Chemistry journal article supplement (doi:10.1039/d1qo01284c), 2021-01-01

## Supporting Information

### Nickel-Catalyzed Cascade Carbonylative Synthesis of *N*-Benzoyl Indoles from 2-Nitroalkynes and Aryl Iodides

Lingyun Yao,<sup>a</sup> Jun Ying,<sup>\*a</sup> and Xiao-Feng Wu<sup>\*b</sup>

<sup>a</sup> Department of Chemistry, Key Laboratory of Surface & Interface Science of Polymer Materials of Zhejiang Province, Zhejiang Sci-Tech University, Hangzhou 310018, China.

<sup>b</sup> Dalian National Laboratory for Clean Energy, Dalian Institute of Chemical Physics, Chinese Academy of Sciences, 116023 Dalian, Liaoning, China; Leibniz-Institut für Katalyse e. V., Albert-Einstein-Straße 29a, 18059 Rostock, Germany.

\*E-mail: yingjun@zstu.edu.cn

\*E-mail: xiao-feng.wu@catalysis.de

### Table of Contents

|                                                                                            |     |
|--------------------------------------------------------------------------------------------|-----|
| 1. General experimental information .....                                                  | S1  |
| 2. General procedure for the synthesis of 2-nitroalkynes (1a-i).....                       | S1  |
| 3. General procedure for the synthesis of <i>N</i> -acyl indoles (3aa-ar and 3ba-ia) ..... | S2  |
| 4. Characterization data of compounds 1a-i .....                                           | S3  |
| 5. Characterization data of products 3aa-ar, 3ba-ia, and 4 .....                           | S6  |
| 6. References .....                                                                        | S15 |
| 7. <sup>1</sup> H, <sup>13</sup> C spectra of 1a-i, 3aa-ar, 3ba-ia, and 4 .....            | S16 |

## 1. General experimental information

Unless otherwise noted, all reactions were carried out under nitrogen atmosphere. All commercially available reagents were used without further purification. All of the solvents were treated according to known methods. Column chromatography was performed on silica gel (200-400 mesh).  $^1\text{H}$  NMR (400 MHz) chemical shifts were reported in ppm ( $\delta$ ) relative to tetramethylsilane (TMS) with the solvent resonance employed as the internal standard.  $^{13}\text{C}$  NMR (101 MHz) chemical shifts were reported in ppm ( $\delta$ ) from tetramethylsilane (TMS) with the solvent resonance as the internal standard. Data were reported as follows: chemical shift, multiplicity (s = singlet, d = doublet, t = triplet, q = quartet, dd = doublet of doublets, td = triplet of doublets, qd = quartet of doublets, m = multiplet), coupling constants (Hz) and integration. HRMS measurements were obtained on a TOF analyzer.

## 2. General procedure for the synthesis of 2-nitroalkynes (1a-i)

The 2-nitroalkynes **1a-i** were prepared according to a general procedure reported by Shi.<sup>1</sup>

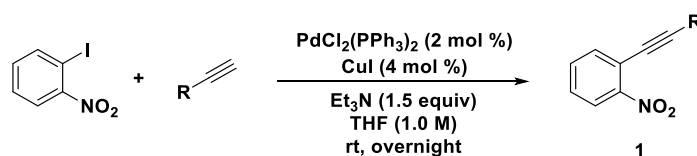

To a 50 mL flask charged with 1-iodo-2-nitrobenzene (5.0 mmol, 1.0 equiv), PdCl<sub>2</sub>(PPh<sub>3</sub>)<sub>2</sub> (70.2 mg, 0.1 mmol, 2 mol%) and CuI (38.1 mg, 0.2 mmol, 4 mol%) in dry THF (5 mL) was added Et<sub>3</sub>N (7.5 mmol, 1.5 equiv) and an alkyne (6.0 mmol, 1.2 equiv) under N<sub>2</sub> atmosphere and the resulting solution was stirred at room temperature overnight. Upon completion, the solvent was removed under reduced pressure and the residue was extracted with ethyl acetate (3 × 5 mL), water (2 × 10 mL) and brine (10 mL). The combined organic layer was dried over Na<sub>2</sub>SO<sub>4</sub> and concentrated. The residue was purified by a silica-gel column chromatography (petroleum ether / ethyl acetate = 30 / 1) to give the 2-nitroalkyne **1**.

### 3. General procedure for the synthesis of *N*-acyl indoles (3aa–ar and 3ba–ia)

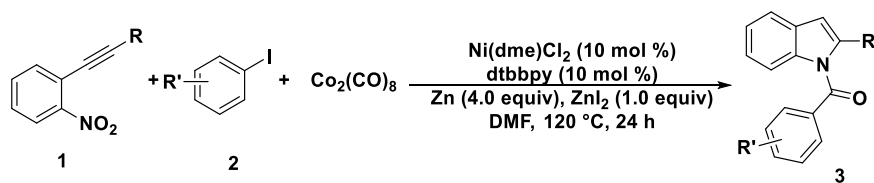

2-nitroalkyne **1** (0.3 mmol, 1.5 equiv), Ni(dme)Cl<sub>2</sub> (4.4 mg, 0.02 mmol, 10 mol%), dtbbpy (54 mg, 0.02 mmol, 10 mol%), Zn (52.3 mg, 0.8 mmol, 4.0 equiv), ZnI<sub>2</sub> (63.8 mg, 0.2 mmol, 1.0 equiv), and Co<sub>2</sub>(CO)<sub>8</sub> (54.7 mg, 0.16 mmol, 0.8 equiv) were added to an oven-dried tube (15 mL). Then the tube was placed under vacuum and refilled with nitrogen three times. An aryl iodide **2** (0.2 mmol, 1.0 equiv) and DMF (2.0 mL) were added into the tube via syringe. The tube was sealed and stirred at 120 °C for 24 h. The resulting mixture was purified by silica-gel column chromatography (petroleum ether/ ethyl acetate = 50 / 1) to obtain the *N*-acyl indole **3**.

1 mmol scale: 2-nitroalkyne **1a** (1.5 mmol, 1.5 equiv), Ni(dme)Cl<sub>2</sub> (10 mol%), dtbbpy (10 mol%), Zn (4.0 equiv), ZnI<sub>2</sub> (1.0 equiv), and Co<sub>2</sub>(CO)<sub>8</sub> (0.8 equiv) were added to an oven-dried tube (15 mL). Then the tube was placed under vacuum and refilled with nitrogen three times. An aryl iodide **2e** (1 mmol, 1.0 equiv) and DMF (5.0 mL) were added into the tube via syringe. The tube was sealed and stirred at 120 °C for 24 h. The resulting mixture was purified by silica-gel column chromatography (petroleum ether/ ethyl acetate = 50 / 1) to obtain the *N*-acyl indole **3ae** in 66% yield (215.6 mg).

#### 4. Characterization data of compounds 1a-i

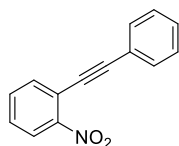

**1-nitro-2-(phenylethynyl)benzene (1a).**<sup>2</sup> Yellow oil in 75% yield; <sup>1</sup>H NMR (400 MHz, CDCl<sub>3</sub>)  $\delta$  8.07 (d,  $J$  = 8.2 Hz, 1H), 7.71 (dd,  $J$  = 7.8, 1.0 Hz, 1H), 7.63 – 7.55 (m, 3H), 7.49 – 7.42 (m, 1H), 7.40 – 7.35 (m, 3H); <sup>13</sup>C NMR (101 MHz, CDCl<sub>3</sub>)  $\delta$  149.6, 134.6, 132.9, 132.1, 129.3, 128.6, 128.5, 124.8, 122.4, 118.7, 97.2, 84.9.

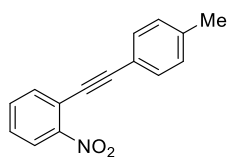

**1-nitro-2-(p-tolyethynyl)benzene (1b).**<sup>3</sup> Yellow solid in 68% yield, mp 58.7 – 59.8 °C; <sup>1</sup>H NMR (400 MHz, CDCl<sub>3</sub>)  $\delta$  8.06 (dd,  $J$  = 8.3, 0.9 Hz, 1H), 7.69 (dd,  $J$  = 7.8, 1.2 Hz, 1H), 7.58 (td,  $J$  = 7.6, 1.1 Hz, 1H), 7.49 (d,  $J$  = 8.1 Hz, 2H), 7.46 – 7.39 (m, 1H), 7.18 (d,  $J$  = 7.9 Hz, 2H), 2.38 (s, 3H); <sup>13</sup>C NMR (101 MHz, CDCl<sub>3</sub>)  $\delta$  149.6, 139.7, 134.6, 132.9, 132.0, 129.3, 128.4, 124.8, 119.4, 119.1, 97.6, 84.4, 21.7.

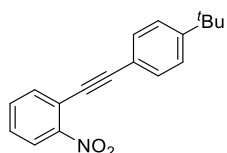

**1-((4-tert-butyl)phenyl)ethynyl)-2-nitrobenzene (1c).**<sup>3</sup> Yellow solid in 80% yield, mp 83.4 – 85.0 °C; <sup>1</sup>H NMR (400 MHz, CDCl<sub>3</sub>)  $\delta$  8.07 (dd,  $J$  = 8.3, 1.0 Hz, 1H), 7.71 (dd,  $J$  = 7.8, 1.2 Hz, 1H), 7.58 (td,  $J$  = 7.6, 1.2 Hz, 1H), 7.56 – 7.52 (m, 2H), 7.47 – 7.38 (m, 3H), 1.34 (s, 9H); <sup>13</sup>C NMR (101 MHz, CDCl<sub>3</sub>)  $\delta$  152.8, 149.7, 134.7, 132.9, 131.9, 128.4, 125.6, 124.8, 119.5, 119.2, 97.7, 84.4, 35.0, 31.3.

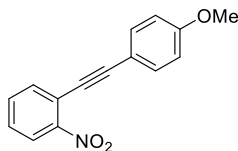

**1-((4-methoxyphenyl)ethynyl)-2-nitrobenzene (1d).**<sup>3</sup> Yellow solid in 73% yield, mp 66.8 – 68.0 °C; <sup>1</sup>H NMR (400 MHz, CDCl<sub>3</sub>) δ 8.06 (dd, *J* = 8.3, 1.0 Hz, 1H), 7.68 (dd, *J* = 7.8, 1.3 Hz, 1H), 7.60 – 7.50 (m, 3H), 7.46 – 7.38 (m, 1H), 6.94 – 6.84 (m, 2H), 3.83 (s, 3H); <sup>13</sup>C NMR (101 MHz, CDCl<sub>3</sub>) δ 160.5, 149.5, 134.5, 133.8, 132.9, 128.2, 124.8, 119.3, 114.5, 114.2, 97.7, 84.0, 55.5.

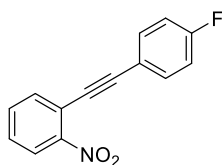

**1-((4-fluorophenyl)ethynyl)-2-nitrobenzene (1e).**<sup>3</sup> Yellow solid in 62% yield, mp 78.4 – 79.5 °C; <sup>1</sup>H NMR (400 MHz, CDCl<sub>3</sub>) δ 8.08 (d, *J* = 8.2 Hz, 1H), 7.70 (dd, *J* = 7.8, 1.1 Hz, 1H), 7.62 – 7.55 (m, 3H), 7.50 – 7.44 (m, 1H), 7.07 (t, *J* = 8.7 Hz, 2H); <sup>13</sup>C NMR (101 MHz, CDCl<sub>3</sub>) δ 163.2 (d, *J* = 251.1 Hz, 1C), 149.7, 134.6, 134.2 (d, *J* = 8.6 Hz, 1C), 133.0, 128.7, 124.9, 118.8, 118.7 (d, *J* = 3.4 Hz, 1C), 116.0 (d, *J* = 22.2 Hz, 1C), 96.2, 84.7.

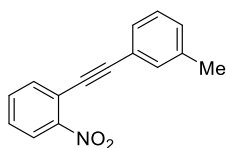

**1-nitro-2-(*m*-tolylethynyl)benzene (1f).**<sup>3</sup> Yellow oil in 71% yield; <sup>1</sup>H NMR (400 MHz, CDCl<sub>3</sub>) δ 8.04 (dd, *J* = 8.3, 1.0 Hz, 1H), 7.68 (dd, *J* = 7.8, 1.3 Hz, 1H), 7.56 (td, *J* = 7.6, 1.2 Hz, 1H), 7.46 – 7.37 (m, 3H), 7.25 (t, *J* = 7.6 Hz, 1H), 7.18 (d, *J* = 7.6 Hz, 1H), 2.35 (s, 3H); <sup>13</sup>C NMR (101 MHz, CDCl<sub>3</sub>) δ 149.6, 138.3, 134.6, 132.9, 132.6, 130.2, 129.2, 128.5, 128.4, 124.8, 122.2, 118.9, 97.5, 84.5, 21.3.

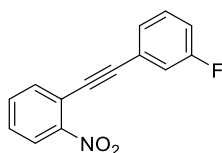

**1-((3-fluorophenyl)ethynyl)-2-nitrobenzene (1g).**<sup>4</sup> Yellow oil in 69% yield; <sup>1</sup>H NMR (400 MHz,

$\text{CDCl}_3$ )  $\delta$  8.08 (dd,  $J = 8.3, 1.0$  Hz, 1H), 7.71 (dd,  $J = 7.8, 1.3$  Hz, 1H), 7.61 (td,  $J = 7.6, 1.2$  Hz, 1H), 7.51 – 7.45 (m, 1H), 7.39 – 7.26 (m, 3H), 7.12 – 7.05 (m, 1H);  $^{13}\text{C}$  NMR (101 MHz,  $\text{CDCl}_3$ )  $\delta$  162.5 (d,  $J = 247.1$  Hz, 1C), 149.8, 134.7, 133.0, 130.2 (d,  $J = 8.6$  Hz, 1C), 129.0, 128.0 (d,  $J = 3.0$  Hz, 1C), 124.9, 124.3 (d,  $J = 9.5$  Hz, 1C), 118.8 (d,  $J = 22.9$  Hz, 1C), 118.4, 116.7 (d,  $J = 21.2$  Hz, 1C), 95.7 (d,  $J = 3.4$  Hz, 1C), 85.6.

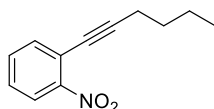

**1-(hex-1-yn-1-yl)-2-nitrobenzene (1h).**<sup>2</sup> Yellow oil in 78% yield;  $^1\text{H}$  NMR (400 MHz,  $\text{CDCl}_3$ )  $\delta$  7.91 (dd,  $J = 8.2, 0.7$  Hz, 1H), 7.55 – 7.45 (m, 2H), 7.38 – 7.32 (m, 1H), 2.44 (t,  $J = 7.0$  Hz, 2H), 1.63 – 1.53 (m, 2H), 1.51 – 1.42 (m, 2H), 0.92 (t,  $J = 7.3$  Hz, 3H).  $^{13}\text{C}$  NMR (101 MHz,  $\text{CDCl}_3$ )  $\delta$  150.1, 134.8, 132.6, 127.9, 124.4, 119.4, 99.4, 76.0, 30.4, 22.0, 19.5, 13.6.

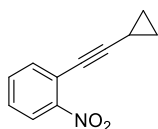

**1-(cyclopropylethynyl)-2-nitrobenzene (1i).**<sup>2</sup> Yellow oil in 59% yield;  $^1\text{H}$  NMR (400 MHz,  $\text{CDCl}_3$ )  $\delta$  7.95 (dd,  $J = 8.2, 0.8$  Hz, 1H), 7.58 – 7.45 (m, 2H), 7.39 – 7.32 (m, 1H), 1.56 – 1.45 (m, 1H), 1.00 – 0.83 (m, 4H);  $^{13}\text{C}$  NMR (101 MHz,  $\text{CDCl}_3$ )  $\delta$  150.1, 134.7, 132.7, 127.7, 124.5, 119.5, 102.8, 71.3, 9.3, 0.8.

## 5. Characterization data of products 3aa–ar, 3ba–ia, and 4

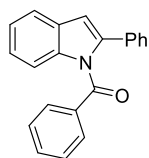

**phenyl(2-phenyl-1H-indol-1-yl)methanone (3aa).**<sup>5</sup> Yellow solid, 38.1 mg, 64% yield, mp 108.3 – 110.7 °C; <sup>1</sup>H NMR (400 MHz, CDCl<sub>3</sub>) δ 7.71 – 7.66 (m, 1H), 7.65 – 7.57 (m, 3H), 7.41 – 7.34 (m, 1H), 7.32 – 7.21 (m, 6H), 7.20 – 7.14 (m, 2H), 7.14 – 7.08 (m, 1H), 6.77 (s, 1H); <sup>13</sup>C NMR (101 MHz, CDCl<sub>3</sub>) δ 170.2, 141.4, 138.4, 135.2, 133.1, 132.9, 130.4, 129.4, 128.45, 128.37, 128.3, 127.6, 124.3, 123.2, 120.8, 114.2, 109.5.

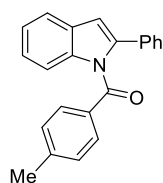

**(2-phenyl-1H-indol-1-yl)(p-tolyl)methanone (3ab).**<sup>5</sup> Yellow solid, 42.3 mg, 68% yield, mp 144.4 – 147.0 °C; <sup>1</sup>H NMR (400 MHz, CDCl<sub>3</sub>) δ 7.68 – 7.63 (m, 1H), 7.61 – 7.56 (m, 3H), 7.37 – 7.32 (m, 2H), 7.29 – 7.13 (m, 5H), 7.10 (d, *J* = 8.0 Hz, 2H), 6.80 (s, 1H), 2.34 (s, 3H); <sup>13</sup>C NMR (101 MHz, CDCl<sub>3</sub>) δ 170.1, 144.0, 141.5, 138.4, 133.2, 132.3, 130.6, 129.4, 129.2, 128.33, 128.30, 127.6, 124.1, 123.0, 120.8, 114.0, 109.2, 21.7.

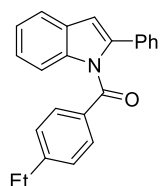

**(4-ethylphenyl)(2-phenyl-1H-indol-1-yl)methanone (3ac).** Yellow oil, 41.7 mg, 64% yield; <sup>1</sup>H NMR (400 MHz, CDCl<sub>3</sub>) δ 7.64 – 7.55 (m, 4H), 7.31 (dd, *J* = 5.2, 3.3 Hz, 2H), 7.27 – 7.21 (m, 2H), 7.21 – 7.16 (m, 2H), 7.15 – 7.11 (m, 1H), 7.09 (d, *J* = 8.3 Hz, 2H), 6.77 (s, 1H), 2.61 (q, *J* = 7.6 Hz, 2H), 1.17 (t, *J* = 7.6 Hz, 3H); <sup>13</sup>C NMR (101 MHz, CDCl<sub>3</sub>) δ 170.1, 141.5, 138.4, 133.2, 132.6, 130.7, 129.4, 128.4, 128.3, 128.0, 127.6, 124.1, 123.0, 120.8, 114.1, 109.2, 29.1, 15.3; HRMS (ESI-TOF) Calcd. for C<sub>23</sub>H<sub>19</sub>NONa<sup>+</sup> [M+Na]<sup>+</sup>: 348.1359; found: 348.1363.

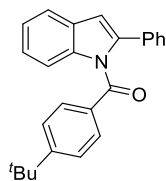

**(4-*tert*-butylphenyl)(2-phenyl-1*H*-indol-1-yl)methanone (3ad).**<sup>5</sup> Yellow oil, 50.2mg, 71% yield; <sup>1</sup>H NMR (400 MHz, CDCl<sub>3</sub>)  $\delta$  7.69 – 7.60 (m, 2H), 7.58 – 7.53 (m, 2H), 7.30 – 7.22 (m, 6H), 7.18 – 7.12 (m, 2H), 7.12 – 7.06 (m, 1H), 6.76 (s, 1H), 1.25 (s, 9H); <sup>13</sup>C NMR (101 MHz, CDCl<sub>3</sub>)  $\delta$  170.1, 156.7, 141.6, 138.4, 133.2, 132.3, 130.4, 129.4, 128.5, 128.2, 127.5, 125.3, 124.2, 123.1, 120.8, 114.2, 109.3, 35.2, 31.1.

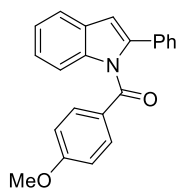

**(4-methoxyphenyl)(2-phenyl-1*H*-indol-1-yl)methanone (3ae).**<sup>5</sup> Yellow oil, 46.5 mg, 71% yield; <sup>1</sup>H NMR (400 MHz, CDCl<sub>3</sub>)  $\delta$  7.67 – 7.60 (m, 3H), 7.57 – 7.52 (m, 1H), 7.35 – 7.30 (m, 2H), 7.26 – 7.18 (m, 4H), 7.17 – 7.12 (m, 1H), 6.79 – 6.73 (m, 3H), 3.77 (s, 3H); <sup>13</sup>C NMR (101 MHz, CDCl<sub>3</sub>)  $\delta$  169.4, 163.6, 141.5, 138.4, 133.1, 132.9, 129.3, 128.35, 128.27, 127.6, 127.3, 124.0, 122.8, 120.8, 113.8, 108.8, 55.6.

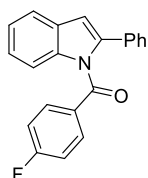

**(4-fluorophenyl)(2-phenyl-1*H*-indol-1-yl)methanone (3af).**<sup>5</sup> Yellow oil, 32.8 mg, 52% yield; <sup>1</sup>H NMR (400 MHz, CDCl<sub>3</sub>)  $\delta$  7.78 – 7.74 (m, 1H), 7.68 – 7.60 (m, 3H), 7.32 – 7.27 (m, 4H), 7.22 – 7.13 (m, 3H), 6.92 (t,  $J$  = 8.6 Hz, 2H), 6.79 (s, 1H); <sup>13</sup>C NMR (101 MHz, CDCl<sub>3</sub>)  $\delta$  169.0, 165.4 (d,  $J$  = 255.1 Hz, 1C), 141.1, 138.3, 133.0 (d,  $J$  = 9.5 Hz, 1C), 131.5 (d,  $J$  = 2.9 Hz, 1C), 129.3, 128.5, 128.4, 127.8, 124.5, 123.4, 120.9, 115.6 (d,  $J$  = 22.2 Hz, 1C), 114.1, 109.6.



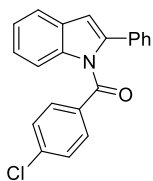

**(4-chlorophenyl)(2-phenyl-1*H*-indol-1-yl)methanone (3ag).**<sup>5</sup> Yellow oil, 35.8 mg, 54% yield; <sup>1</sup>H NMR (400 MHz, CDCl<sub>3</sub>)  $\delta$  7.81 – 7.74 (m, 1H), 7.68 – 7.63 (m, 1H), 7.56 – 7.52 (m, 2H), 7.33 – 7.27 (m, 4H), 7.23 – 7.13 (m, 5H), 6.79 (s, 1H); <sup>13</sup>C NMR (101 MHz, CDCl<sub>3</sub>)  $\delta$  169.1, 141.1, 139.2, 138.2, 133.6, 132.9, 131.7, 129.4, 128.7, 128.5, 128.4, 127.9, 124.6, 123.5, 120.9, 114.2, 109.8.

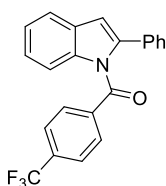

**(2-phenyl-1*H*-indol-1-yl)(4-(trifluoromethyl)phenyl)methanone (3ah).**<sup>5</sup> Yellow solid, 46.8 mg, 64% yield, mp 110.6 – 113.9 °C; <sup>1</sup>H NMR (400 MHz, CDCl<sub>3</sub>)  $\delta$  7.92 – 7.87 (m, 1H), 7.67 – 7.61 (m, 3H), 7.44 (d, *J* = 8.2 Hz, 2H), 7.36 – 7.29 (m, 2H), 7.24 – 7.19 (m, 2H), 7.17 – 7.08 (m, 3H), 6.78 (s, 1H); <sup>13</sup>C NMR (101 MHz, CDCl<sub>3</sub>)  $\delta$  168.9, 140.9, 138.6, 138.3, 133.8 (q, *J* = 32.8 Hz, 1C), 132.9, 130.5, 129.4, 128.7, 128.4, 128.0, 125.2 (q, *J* = 3.6 Hz, 1C), 124.9, 123.9, 121.0, 120.8 (q, *J* = 272.7 Hz, 1C), 114.5, 110.4.

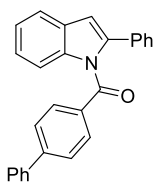

**[1,1'-biphenyl]-4-yl(2-phenyl-1*H*-indol-1-yl)methanone (3ai).**<sup>5</sup> Yellow oil, 40.3 mg, 54% yield; <sup>1</sup>H NMR (400 MHz, CDCl<sub>3</sub>)  $\delta$  7.77 – 7.64 (m, 4H), 7.54 (d, *J* = 7.2 Hz, 2H), 7.51 – 7.43 (m, 4H), 7.40 (t, *J* = 7.2 Hz, 1H), 7.35 (d, *J* = 7.2 Hz, 2H), 7.31 – 7.27 (m, 2H), 7.21 (t, *J* = 7.5 Hz, 2H), 7.13 (t, *J* = 7.3 Hz, 1H), 6.82 (s, 1H); <sup>13</sup>C NMR (101 MHz, CDCl<sub>3</sub>)  $\delta$  169.9, 145.6, 141.4, 139.9, 138.4, 133.8, 133.2, 131.0, 129.4, 129.1, 128.5, 128.4, 128.3, 127.7, 127.3, 127.0, 124.3, 123.2, 120.9, 114.2, 109.5.

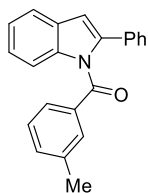

**(2-phenyl-1*H*-indol-1-yl)(*m*-tolyl)methanone (3aj).**<sup>5</sup> Yellow oil, 36.1 mg, 58% yield; <sup>1</sup>H NMR (400 MHz, CDCl<sub>3</sub>) δ 7.70 – 7.66 (m, 1H), 7.65 – 7.61 (m, 1H), 7.45 (d, *J* = 7.4 Hz, 1H), 7.39 (s, 1H), 7.31 – 7.23 (m, 4H), 7.21 – 7.09 (m, 5H), 6.76 (s, 1H), 2.24 (s, 3H); <sup>13</sup>C NMR (101 MHz, CDCl<sub>3</sub>) δ 170.3, 141.4, 138.4, 138.1, 135.0, 133.7, 133.3, 131.0, 129.3, 128.4, 128.2, 127.6, 124.3, 123.2, 120.8, 114.2, 109.5, 21.2.

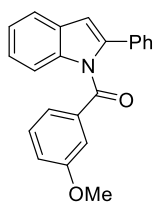

**(3-methoxyphenyl)(2-phenyl-1*H*-indol-1-yl)methanone (3ak).** Yellow oil, 45.2 mg, 69% yield; <sup>1</sup>H NMR (400 MHz, CDCl<sub>3</sub>) δ 7.74 – 7.68 (m, 1H), 7.68 – 7.62 (m, 1H), 7.35 – 7.25 (m, 4H), 7.24 – 7.12 (m, 6H), 6.97 – 6.92 (m, 1H), 6.79 (s, 1H), 3.76 (s, 3H); <sup>13</sup>C NMR (101 MHz, CDCl<sub>3</sub>) δ 170.0, 159.4, 141.4, 138.4, 136.4, 133.2, 129.5, 129.4, 128.34, 128.29, 127.7, 124.3, 123.2, 123.0, 120.8, 119.6, 114.7, 114.2, 109.6, 55.5; HRMS (ESI-TOF) Calcd. for C<sub>22</sub>H<sub>17</sub>NO<sub>2</sub>Na<sup>+</sup> [M+Na]<sup>+</sup>: 350.1151; found: 350.1155.

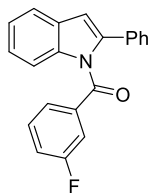

**(3-fluorophenyl)(2-phenyl-1*H*-indol-1-yl)methanone (3al).**<sup>5</sup> Yellow oil, 37.8 mg, 60% yield; <sup>1</sup>H NMR (400 MHz, CDCl<sub>3</sub>) δ 7.85 – 7.79 (m, 1H), 7.66 – 7.60 (m, 1H), 7.36 – 7.32 (m, 1H), 7.31 – 7.23 (m, 5H), 7.20 – 7.08 (m, 4H), 7.06 – 6.99 (m, 1H), 6.76 (s, 1H); <sup>13</sup>C NMR (101 MHz, CDCl<sub>3</sub>) δ 168.9, 162.2 (d, *J* = 248.3 Hz, 1C), 141.0, 138.3, 137.4 (d, *J* = 7.1 Hz, 1C), 133.1, 130.0 (d, *J* = 7.8 Hz, 1C), 129.4, 128.5, 128.4, 127.8, 126.0 (d, *J* = 3.0 Hz, 1C), 124.7, 123.6, 120.9, 119.7 (d, *J* = 21.3 Hz, 1C), 117.1 (d, *J* = 23.2 Hz, 1C), 114.3, 110.0.

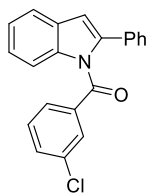

**(3-chlorophenyl)(2-phenyl-1*H*-indol-1-yl)methanone (3am).**<sup>5</sup> Yellow oil, 27.2 mg, 51% yield; <sup>1</sup>H NMR (400 MHz, CDCl<sub>3</sub>) δ 7.91 – 7.85 (m, 1H), 7.69 – 7.62 (m, 1H), 7.52 – 7.45 (m, 2H), 7.36 – 7.25 (m, 5H), 7.22 – 7.10 (m, 4H), 6.78 (s, 1H); <sup>13</sup>C NMR (101 MHz, CDCl<sub>3</sub>) δ 168.7, 141.0, 138.2, 136.9, 134.3, 133.0, 132.5, 130.3, 129.6, 129.4, 128.5, 128.4, 128.3, 127.9, 124.8, 123.7, 120.9, 114.4, 110.1.

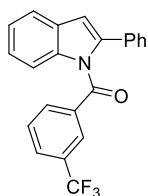

**(2-phenyl-1*H*-indol-1-yl)(3-(trifluoromethyl)phenyl)methanone (3an).** Yellow oil, 40.2 mg, 55% yield; <sup>1</sup>H NMR (400 MHz, CDCl<sub>3</sub>) δ 8.05 – 8.01 (m, 1H), 7.77 (d, *J* = 7.8 Hz, 1H), 7.71 (s, 1H), 7.69 – 7.65 (m, 1H), 7.54 (d, *J* = 7.8 Hz, 1H), 7.40 – 7.31 (m, 3H), 7.25 – 7.21 (m, 2H), 7.16 – 7.05 (m, 3H), 6.79 (s, 1H); <sup>13</sup>C NMR (101 MHz, CDCl<sub>3</sub>) δ 168.7, 140.7, 138.3, 136.2, 133.2, 132.9, 130.6 (q, *J* = 33.2 Hz, 1C), 129.4, 128.9, 128.8 (q, *J* = 3.7 Hz, 1C), 128.7, 128.4, 127.9, 127.1 (q, *J* = 3.7 Hz, 1C), 125.0, 123.9, 123.5 (q, *J* = 272.7 Hz, 1C), 121.0, 114.5, 110.4; HRMS (ESI-TOF) Calcd. for C<sub>22</sub>H<sub>14</sub>F<sub>3</sub>NONa<sup>+</sup> [M+Na]<sup>+</sup>: 388.0920; found: 388.0923.

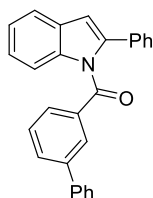

**[1,1'-biphenyl]-3-yl(2-phenyl-1*H*-indol-1-yl)methanone (3ao).** Yellow oil, 41.8 mg, 56% yield; <sup>1</sup>H NMR (400 MHz, CDCl<sub>3</sub>) δ 7.86 – 7.80 (m, 1H), 7.77 (t, *J* = 1.6 Hz, 1H), 7.69 – 7.64 (m, 1H), 7.64 – 7.56 (m, 2H), 7.48 – 7.40 (m, 4H), 7.39 – 7.27 (m, 6H), 7.16 (t, *J* = 7.3 Hz, 2H), 7.13 – 7.07 (m, 1H), 6.80 (s, 1H); <sup>13</sup>C NMR (101 MHz, CDCl<sub>3</sub>) δ 170.2, 141.4, 139.9, 138.4, 135.8, 133.1, 131.4, 129.4, 129.1, 129.02, 128.98, 128.9, 128.5, 128.3, 127.9, 127.7, 127.2, 124.5, 123.4, 120.9, 114.3, 109.7; HRMS (ESI-

TOF) Calcd. for  $C_{27}H_{19}NONa^+$   $[M+Na]^+$ : 396.1359; found: 396.1364.

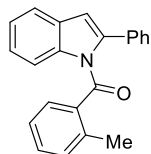

**(2-phenyl-1H-indol-1-yl)(o-tolyl)methanone (3ap).**<sup>5</sup> Yellow oil, 29.3 mg, 47% yield;  $^1H$  NMR (400 MHz,  $CDCl_3$ )  $\delta$  7.76 – 7.70 (m, 1H), 7.66 – 7.60 (m, 1H), 7.31 – 7.26 (m, 4H), 7.22 – 7.11 (m, 5H), 7.06 (d,  $J$  = 8.0 Hz, 1H), 7.01 (t,  $J$  = 7.5 Hz, 1H), 6.72 (s, 1H), 2.37 (s, 3H);  $^{13}C$  NMR (101 MHz,  $CDCl_3$ )  $\delta$  170.4, 141.2, 138.1, 138.0, 135.6, 133.4, 131.5, 131.1, 129.8, 129.5, 128.4, 128.0, 127.7, 125.6, 124.6, 123.5, 120.8, 114.5, 110.5, 19.7.

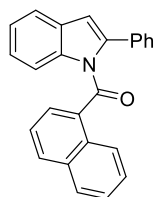

**naphthalen-1-yl(2-phenyl-1H-indol-1-yl)methanone (3aq).** Yellow oil, 35.4 mg, 51% yield;  $^1H$  NMR (400 MHz,  $CDCl_3$ )  $\delta$  8.06 – 7.98 (m, 2H), 7.77 – 7.71 (m, 2H), 7.68 – 7.63 (m, 1H), 7.55 – 7.43 (m, 3H), 7.36 – 7.30 (m, 2H), 7.21 (dd,  $J$  = 8.1, 7.3 Hz, 1H), 7.10 – 7.05 (m, 2H), 6.92 – 6.84 (m, 3H), 6.69 (s, 1H);  $^{13}C$  NMR (101 MHz,  $CDCl_3$ )  $\delta$  169.9, 141.5, 138.2, 133.4, 133.2, 133.0, 132.4, 131.0, 129.5, 129.3, 128.4, 128.3, 127.8, 127.6, 127.3, 126.5, 125.1, 124.8, 124.3, 123.7, 120.8, 115.1, 110.5; HRMS (ESI-TOF) Calcd. for  $C_{25}H_{17}NONa^+$   $[M+Na]^+$ : 370.1202; found: 370.1207.

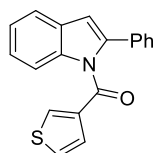

**(2-phenyl-1H-indol-1-yl)(thiophen-3-yl)methanone (3ar).** Yellow oil, 25.5 mg, 42% yield;  $^1H$  NMR (400 MHz,  $CDCl_3$ )  $\delta$  7.84 – 7.80 (m, 1H), 7.73 – 7.70 (m, 1H), 7.68 – 7.61 (m, 1H), 7.36 – 7.27 (m, 5H), 7.26 – 7.20 (m, 2H), 7.20 – 7.14 (m, 1H), 7.12 (dd,  $J$  = 5.1, 3.0 Hz, 1H), 6.79 (s, 1H);  $^{13}C$  NMR (101 MHz,  $CDCl_3$ )  $\delta$  164.4, 140.9, 138.3, 137.8, 134.5, 133.2, 129.3, 128.5, 128.4, 128.2, 127.7, 126.2, 124.4, 123.2, 120.9, 114.0, 109.5; HRMS (ESI-TOF) Calcd. for  $C_{19}H_{13}NOSNa^+$

[M+Na]<sup>+</sup>: 326.0610; found: 326.0612.

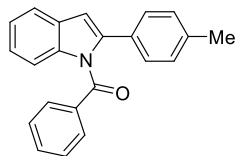

**phenyl(2-(*p*-tolyl)-1*H*-indol-1-yl)methanone (3ba).**<sup>5</sup> Yellow solid, 38.6 mg, 62% yield, mp 114.3 – 117.5 °C; <sup>1</sup>H NMR (400 MHz, CDCl<sub>3</sub>) δ 7.66 – 7.57 (m, 4H), 7.41 (t, *J* = 7.5 Hz, 1H), 7.29 – 7.17 (m, 6H), 6.99 (d, *J* = 7.9 Hz, 2H), 6.73 (s, 1H), 2.24 (s, 3H); <sup>13</sup>C NMR (101 MHz, CDCl<sub>3</sub>) δ 170.3, 141.6, 138.3, 137.5, 135.3, 132.9, 130.4, 130.3, 129.5, 129.0, 128.4, 128.3, 124.1, 123.1, 120.7, 114.1, 109.1, 21.3.

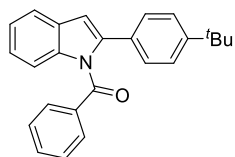

**(2-(4-(*tert*-butyl)phenyl)-1*H*-indol-1-yl)(phenyl)methanone (3ca).**<sup>6</sup> Yellow oil, 38.9 mg, 56% yield, <sup>1</sup>H NMR (400 MHz, CDCl<sub>3</sub>) δ 7.75 – 7.61 (m, 4H), 7.41 (t, *J* = 7.4 Hz, 1H), 7.33 – 7.19 (m, 8H), 6.80 (s, 1H), 1.28 (s, 9H); <sup>13</sup>C NMR (101 MHz, CDCl<sub>3</sub>) δ 170.3, 150.6, 141.5, 138.3, 135.4, 132.7, 130.3, 130.2, 129.5, 128.4, 128.3, 125.1, 124.1, 123.2, 120.7, 114.3, 109.1, 34.6, 31.2.

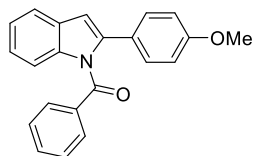

**(2-(4-methoxyphenyl)-1*H*-indol-1-yl)(phenyl)methanone (3da).**<sup>5</sup> Yellow oil, 39.3 mg, 60% yield; <sup>1</sup>H NMR (400 MHz, CDCl<sub>3</sub>) δ 7.68 – 7.59 (m, 4H), 7.41 (t, *J* = 7.5 Hz, 1H), 7.30 – 7.20 (m, 6H), 6.75 – 6.69 (m, 3H), 3.73 (s, 3H); <sup>13</sup>C NMR (101 MHz, CDCl<sub>3</sub>) δ 170.3, 159.1, 141.2, 138.2, 135.2, 132.9, 130.4, 129.7, 129.5, 128.4, 125.7, 124.0, 123.1, 120.6, 55.4.

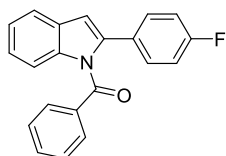

**(2-(4-fluorophenyl)-1H-indol-1-yl)(phenyl)methanone (3ea).**<sup>5</sup> Yellow solid, 29.6 mg, 47% yield, mp 117.9 – 120.2 °C; <sup>1</sup>H NMR (400 MHz, CDCl<sub>3</sub>) δ 7.67 – 7.58 (m, 4H), 7.43 (t, *J* = 7.2 Hz, 1H), 7.32 – 7.21 (m, 6H), 6.88 (t, *J* = 8.4 Hz, 2H), 6.74 (s, 1H); <sup>13</sup>C NMR (101 MHz, CDCl<sub>3</sub>) δ 170.1, 162.2 (d, *J* = 248.1 Hz, 1C), 140.3, 138.3, 135.2, 133.1, 130.3, 130.2 (d, *J* = 8.2 Hz, 1C), 129.4 (d, *J* = 3.2 Hz, 1C), 129.3, 128.5, 124.5, 123.3, 120.9, 115.4 (d, *J* = 21.9 Hz, 1C), 114.2, 109.7.

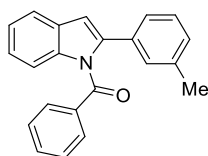

**phenyl(2-(*m*-tolyl)-1H-indol-1-yl)methanone (3fa).**<sup>5</sup> Yellow oil, 36.1 mg, 58% yield, mp 102.7 – 105.5 °C; <sup>1</sup>H NMR (400 MHz, CDCl<sub>3</sub>) δ 7.74 – 7.69 (m, 1H), 7.66 – 7.58 (m, 3H), 7.41 – 7.36 (m, 1H), 7.30 – 7.26 (m, 2H), 7.26 – 7.23 (m, 2H), 7.13 – 7.04 (m, 3H), 6.92 (d, *J* = 7.4 Hz, 1H), 6.78 – 6.75 (m, 1H), 2.23 (s, 3H); <sup>13</sup>C NMR (101 MHz, CDCl<sub>3</sub>) δ 170.3, 141.5, 138.3, 137.8, 135.4, 133.0, 132.8, 130.2, 129.4, 129.3, 128.4, 128.3, 128.2, 125.6, 124.3, 123.2, 120.8, 114.2, 109.4, 21.4.

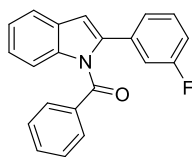

**(2-(3-fluorophenyl)-1H-indol-1-yl)(phenyl)methanone (3ga).** Yellow oil, 31.5 mg, 50% yield; <sup>1</sup>H NMR (400 MHz, CDCl<sub>3</sub>) δ 7.68 – 7.61 (m, 4H), 7.44 (t, *J* = 7.5 Hz, 1H), 7.33 – 7.26 (m, 4H), 7.15 (td, *J* = 7.9, 5.9 Hz, 1H), 7.07 (d, *J* = 7.7 Hz, 1H), 7.05 – 7.00 (m, 1H), 6.86 – 6.79 (m, 2H); <sup>13</sup>C NMR (101 MHz, CDCl<sub>3</sub>) δ 170.0, 162.4 (d, *J* = 246.3 Hz, 1C), 140.0 (d, *J* = 2.3 Hz, 1C), 138.4, 135.3 (d, *J* = 8.4 Hz, 1C), 135.1, 133.1, 130.3, 129.9 (d, *J* = 8.5 Hz, 1C), 129.2, 128.5, 124.8, 124.2 (d, *J* = 2.8 Hz, 1C), 123.4, 121.1, 115.3 (d, *J* = 22.8 Hz, 1C), 114.5 (d, *J* = 21.2 Hz, 1C), 114.3, 110.3. HRMS (ESI-TOF) Calcd. for C<sub>21</sub>H<sub>14</sub>FNONa<sup>+</sup> [M+Na]<sup>+</sup>: 338.0952; found: 338.0954.

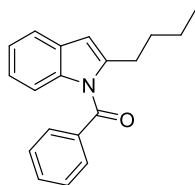

**(2-butyl-1H-indol-1-yl)(phenyl)methanone (3ha).**<sup>6</sup> Yellow oil, 30.0 mg, 54% yield; <sup>1</sup>H NMR (400 MHz, CDCl<sub>3</sub>)  $\delta$  7.76 – 7.71 (m, 2H), 7.64 (dd,  $J$  = 10.6, 4.3 Hz, 1H), 7.50 (t,  $J$  = 7.5 Hz, 3H), 7.16 – 7.10 (m, 1H), 7.02 – 6.96 (m, 1H), 6.87 (d,  $J$  = 8.3 Hz, 1H), 6.49 (s, 1H), 2.89 – 2.81 (m, 2H), 1.68 – 1.58 (m, 2H), 1.35 (dd,  $J$  = 14.9, 7.4 Hz, 2H), 0.90 (t,  $J$  = 7.4 Hz, 3H); <sup>13</sup>C NMR (101 MHz, CDCl<sub>3</sub>)  $\delta$  170.1, 143.2, 137.4, 135.6, 133.2, 130.0, 129.6, 128.9, 122.6, 122.5, 120.1, 114.2, 107.4, 31.3, 28.7, 22.5, 14.0.

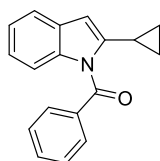

**(2-cyclopropyl-1H-indol-1-yl)(phenyl)methanone (3ia).**<sup>6</sup> Yellow oil, 30.0 mg, 54% yield; <sup>1</sup>H NMR (400 MHz, CDCl<sub>3</sub>)  $\delta$  7.79 – 7.73 (m, 2H), 7.61 (t,  $J$  = 7.5 Hz, 1H), 7.49 (t,  $J$  = 8.0 Hz, 3H), 7.31 (d,  $J$  = 8.1 Hz, 1H), 7.17 (td,  $J$  = 7.5, 1.0 Hz, 1H), 7.13 – 7.07 (m, 1H), 6.34 (s, 1H), 1.87 – 1.77 (m, 1H), 0.78 – 0.66 (m, 4H); <sup>13</sup>C NMR (101 MHz, CDCl<sub>3</sub>)  $\delta$  170.2, 144.3, 137.5, 136.0, 132.8, 129.9, 129.3, 128.7, 123.2, 122.8, 120.1, 114.4, 105.9, 10.4, 8.5.

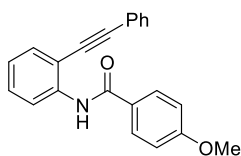

**4-methoxy-N-(2-(phenylethynyl)phenyl)benzamide (4).**<sup>5</sup> White solid, mp 111.5 – 113.8 °C; <sup>1</sup>H NMR (400 MHz, CDCl<sub>3</sub>)  $\delta$  8.87 (s, 1H), 8.61 (d,  $J$  = 8.4 Hz, 1H), 7.93 (dd,  $J$  = 8.8, 1.9 Hz, 2H), 7.60 – 7.51 (m, 3H), 7.44 – 7.37 (m, 4H), 7.10 (t,  $J$  = 7.6 Hz, 1H), 6.97 (dd,  $J$  = 8.8, 1.9 Hz, 2H), 3.88 (s, 3H); <sup>13</sup>C NMR (101 MHz, CDCl<sub>3</sub>)  $\delta$  164.8, 162.8, 139.5, 131.7, 131.6, 130.1, 129.1, 129.0, 128.8, 127.3, 123.4, 122.5, 119.2, 114.3, 112.2, 97.0, 84.8, 55.6.

## 6. References

1. Yu, L.-Z.; Wei, Y.; Shi, M. Copper-catalyzed trifluoromethylazidation and rearrangement of aniline-linked 1,7-enynes: access to CF<sub>3</sub>-substituted azaspirocyclic dihydroquinolin-2-ones and furoindolines. *Chem. Commun.* **2017**, *53*, 8980-8983.
2. Fu, W.; Song, Q. Copper-catalyzed radical difluoroalkylation and redox annulation of nitroalkynes for the construction of C2-tetrasubstituted indolin-3-ones. *Org. Lett.* **2018**, *20*, 393-396.
3. Peng, H.; Ma, J.; Duan, L.; Zhang, G.; Yin, B. CuH-catalyzed synthesis of 3-hydroxyindolines and 2-aryl-3*H*-indol-3-ones from *o*-alkynynitroarenes, using nitro as both the nitrogen and oxygen source. *Org. Lett.* **2019**, *21*, 6194-6198.
4. Yu, Y.; Chen, X.; Wu, Q.; Liu, D.; Hu, L.; Yu, L.; Tan Z.; Gui, Q.; Zhu, G. Synthesis of aryl alkynes via copper catalyzed decarboxylative alkylation of 2-nitrobenzoic acids. *J. Org. Chem.* **2018**, *83*, 8556-8566.
5. Yao, L.; Shang, Y.; Wang, J.-S.; Pan, A.; Ying, J.; Wu, X.-F. Palladium-catalyzed carbonylative cyclization of 2-alkynylanilines and aryl iodides to access *N*-acyl indoles. *Org. Chem. Front.* **2021**, *8*, 1926-1929.
6. Teders, M.; Pitzer, L.; Buss, S.; Glorius, F. Regioselective synthesis of 2-substituted indoles from benzotriazoles and alkynes by photoinitiated denitrogenation. *ACS Catal.* **2017**, *7*, 4053-4056.



## 7. $^1\text{H}$ , $^{13}\text{C}$ spectra of 1a–i, 3aa–ar, 3ba–ia and 4

8.08  
8.06  
7.72  
7.72  
7.70  
7.70  
7.61  
7.61  
7.60  
7.59  
7.57  
7.57  
7.47  
7.47  
7.45  
7.44  
7.43  
7.39  
7.38  
7.37  
7.36

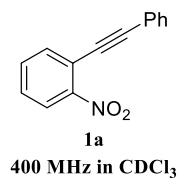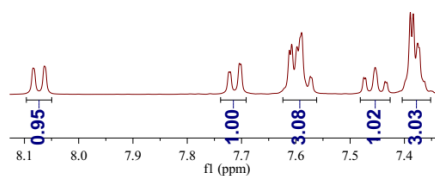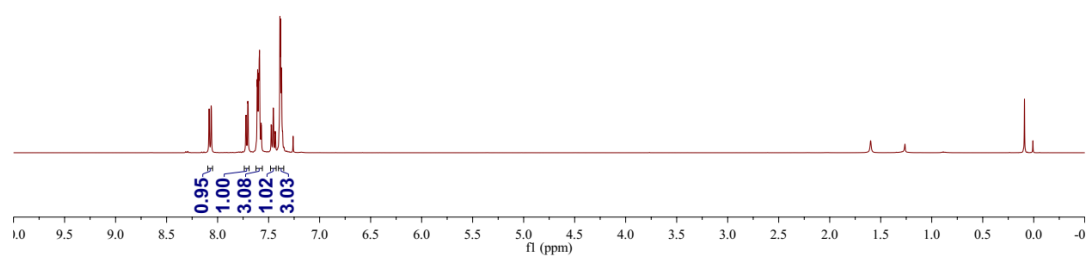

149.6  
134.6  
132.9  
132.1  
129.3  
128.6  
128.5  
124.8  
87.2  
84.9

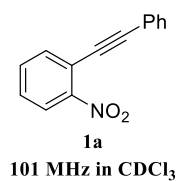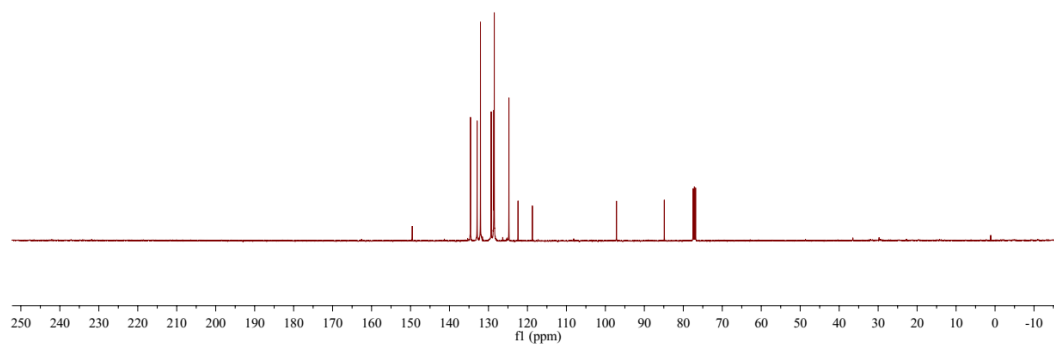

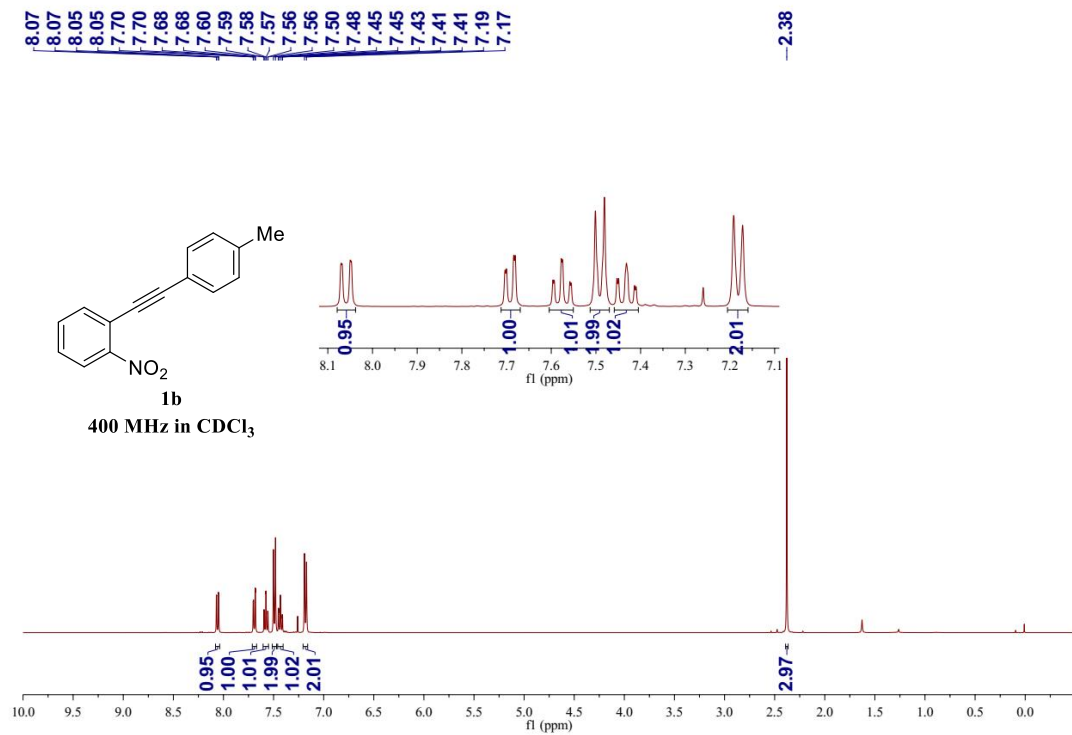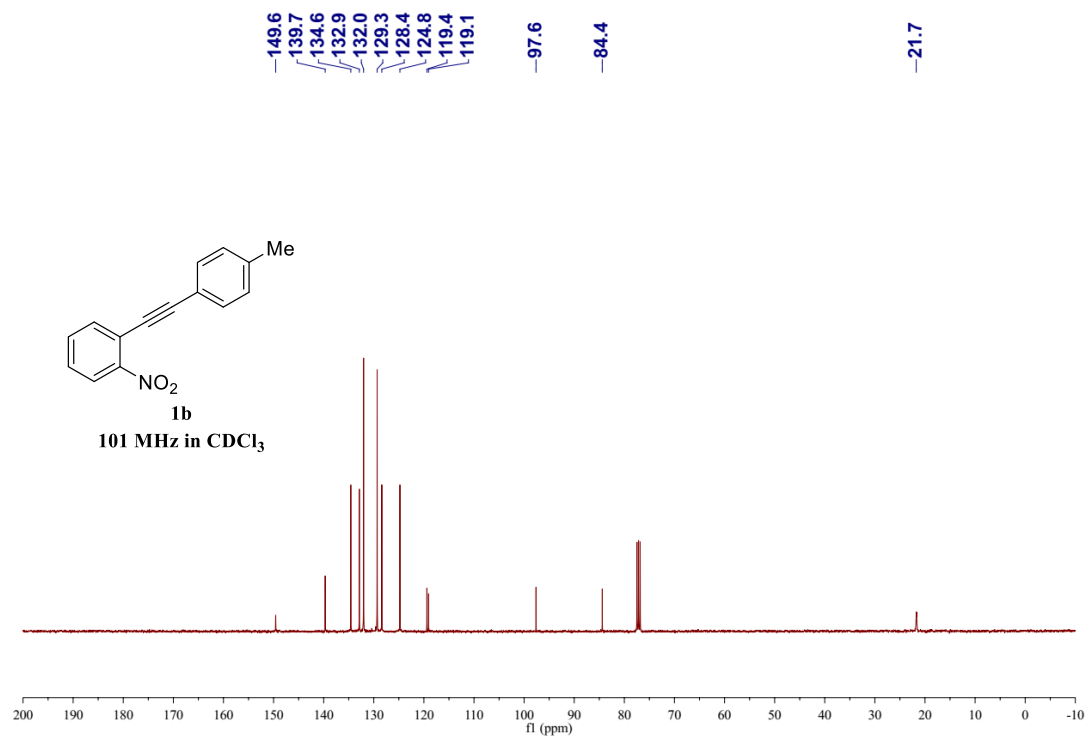

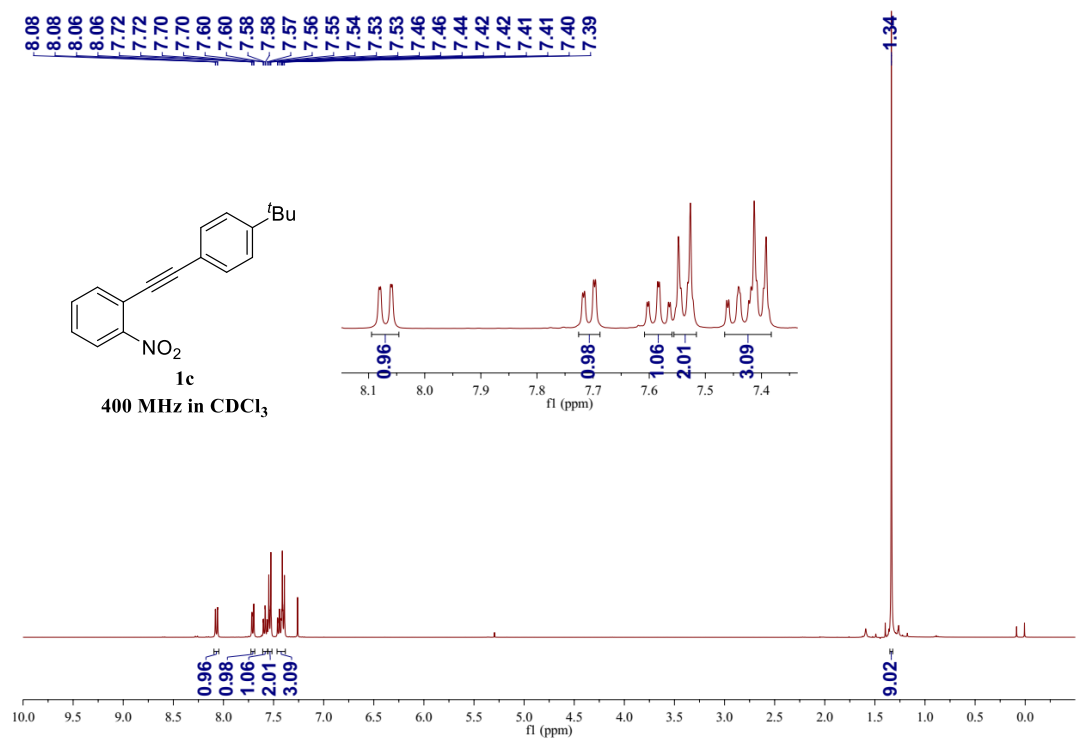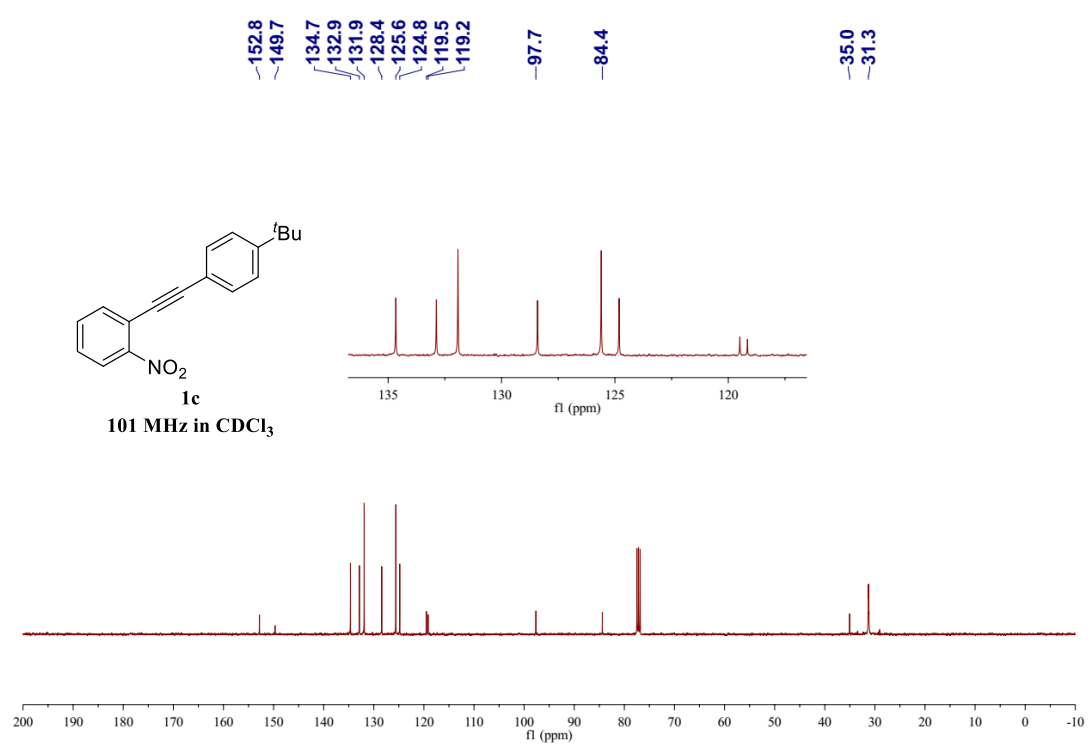

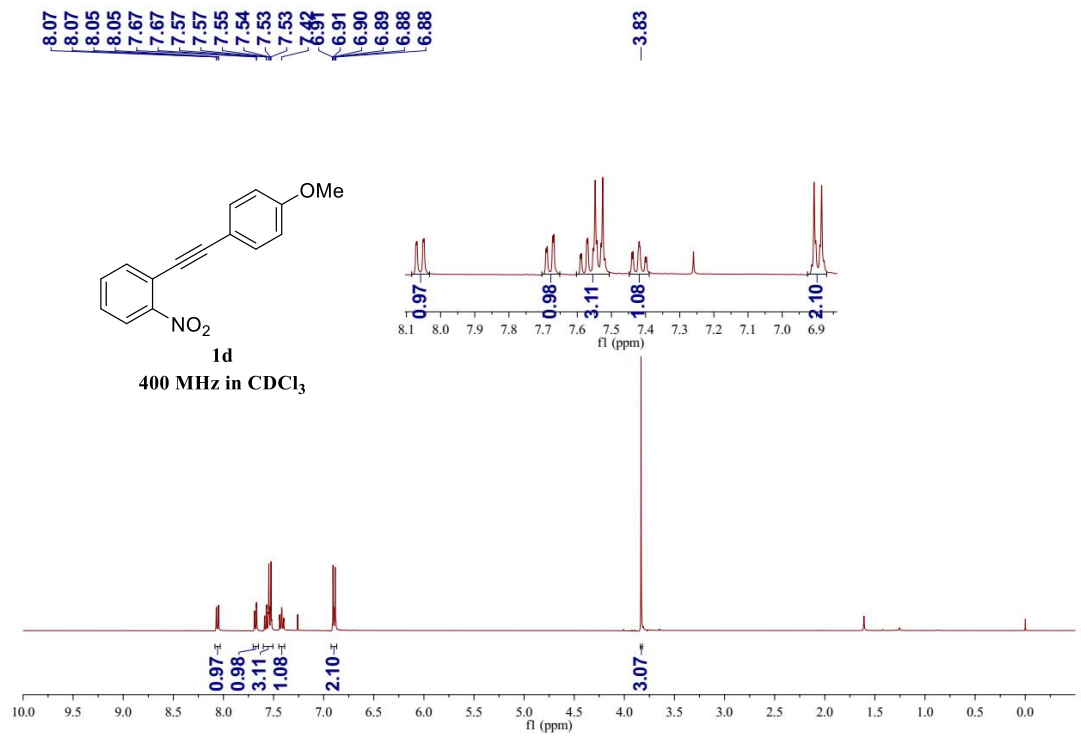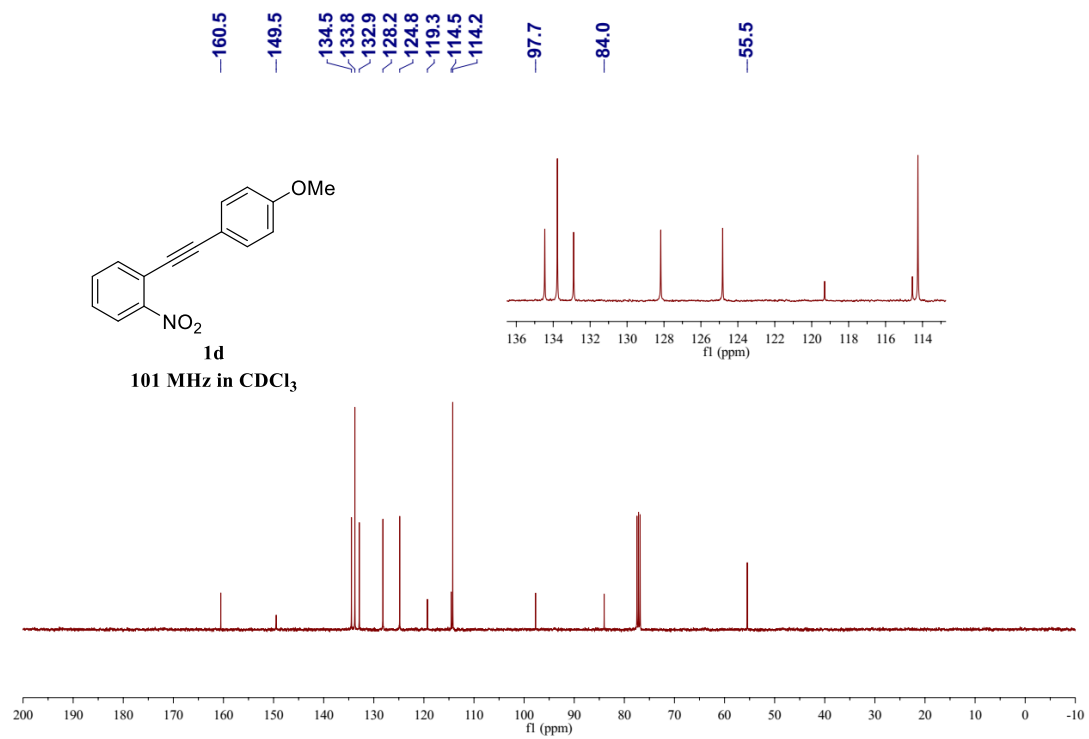

8.09  
8.07  
7.71  
7.71  
7.69  
7.69  
7.62  
7.60  
7.59  
7.58  
7.57  
7.56  
7.49  
7.48  
7.47  
7.45  
7.44

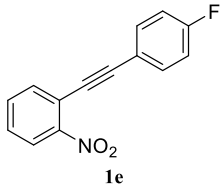

400 MHz in CDCl<sub>3</sub>

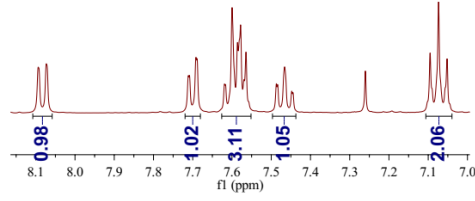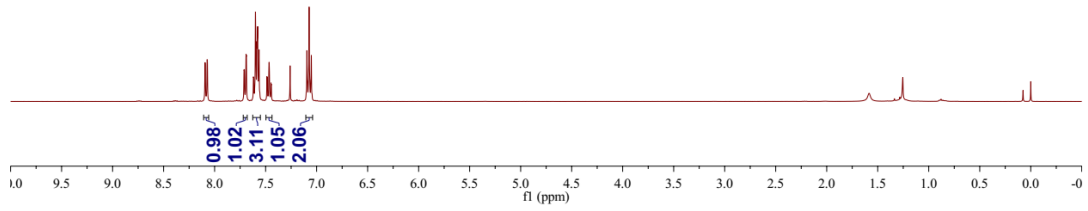

164.5  
162.0  
149.7  
134.6  
134.2  
134.1  
133.0  
128.7  
124.9  
118.8  
118.7  
116.1  
115.9  
96.2  
84.7

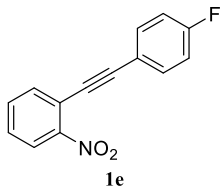

101 MHz in CDCl<sub>3</sub>

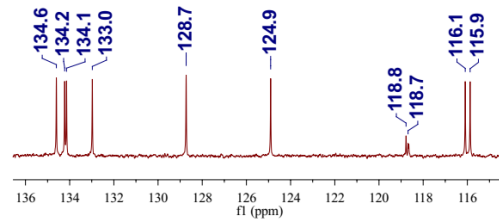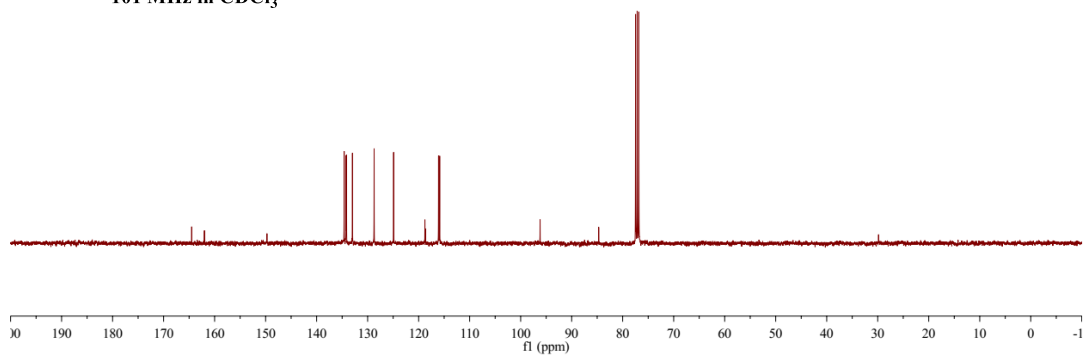

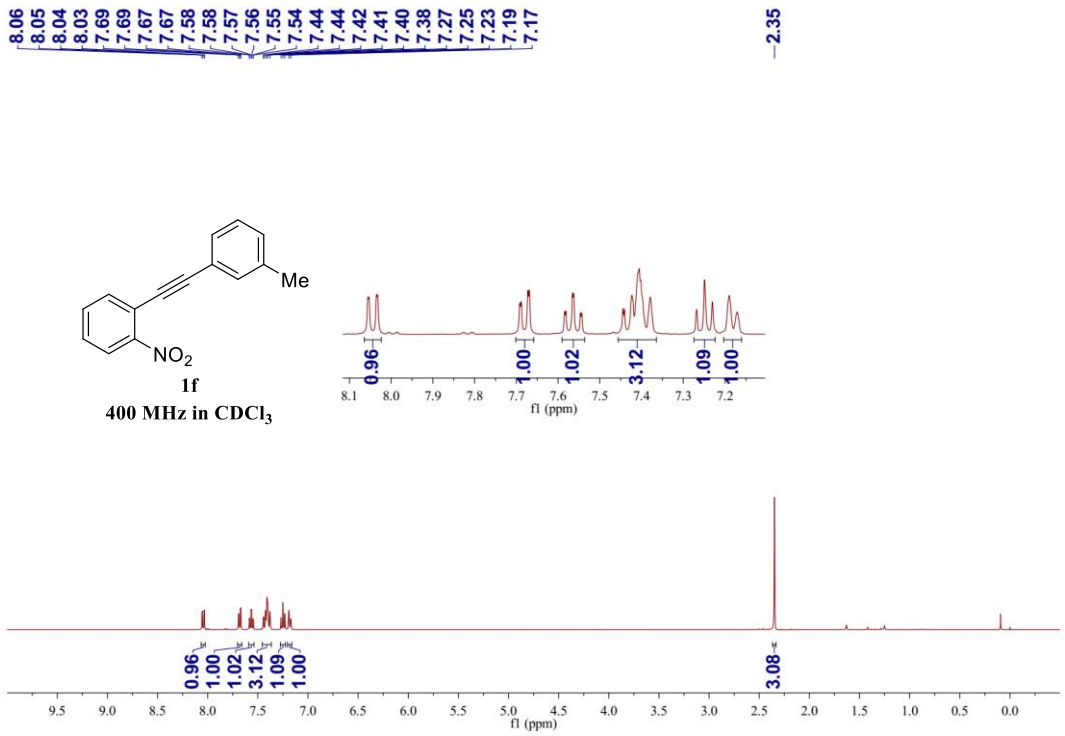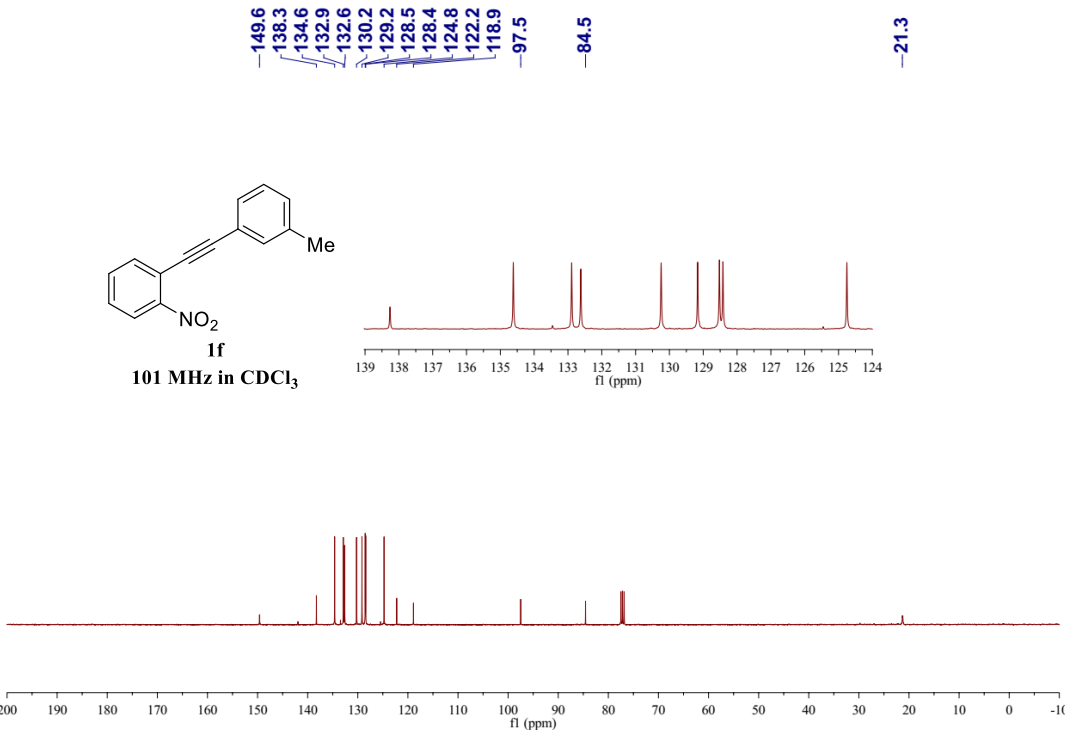

8.10  
8.09  
8.08  
8.07  
7.72  
7.70  
7.63  
7.62  
7.61  
7.60  
7.59  
7.59  
7.50  
7.50  
7.48  
7.46  
7.46  
7.38  
7.38  
7.36  
7.36  
7.35  
7.34  
7.33  
7.32  
7.31  
7.29  
7.29  
7.28  
7.27  
7.27  
7.26  
7.26  
7.11  
7.11  
7.11  
7.10  
7.09  
7.09  
7.08  
7.07  
7.07  
7.06

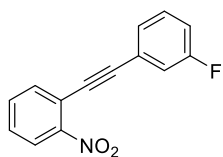

**1g**  
400 MHz in CDCl<sub>3</sub>

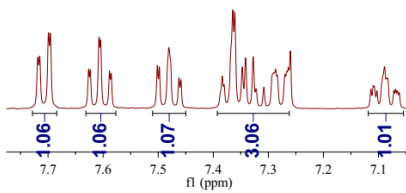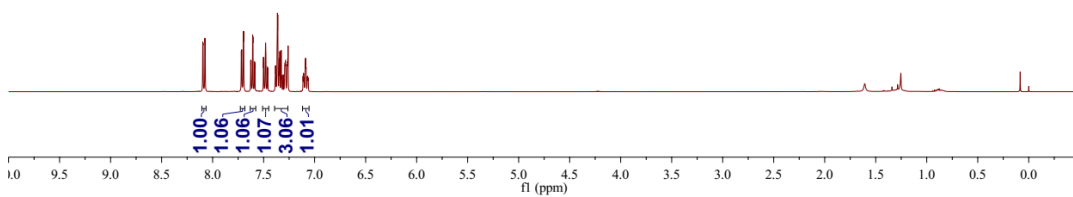

163.7  
161.3  
149.8  
134.7  
133.0  
130.2  
130.2  
129.0  
128.1  
128.0  
124.9  
118.9  
116.8  
95.6  
95.7  
85.6

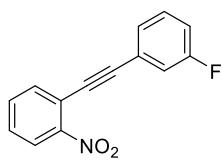

**1g**  
101 MHz in CDCl<sub>3</sub>

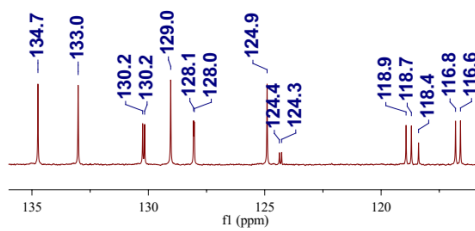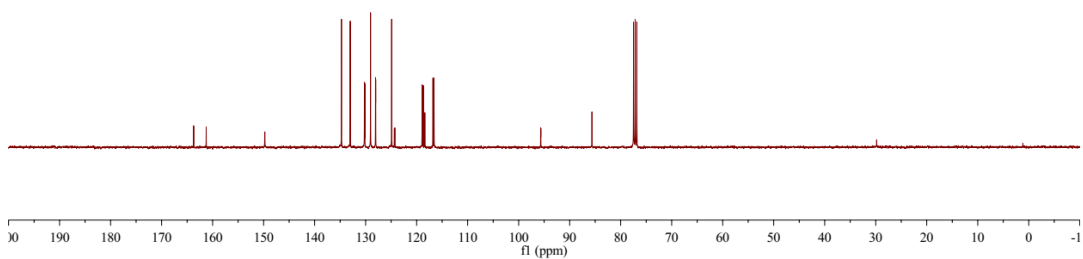

7.92  
7.92  
7.90  
7.90  
7.54  
7.54  
7.52  
7.52  
7.50  
7.49  
7.48  
7.48  
7.46  
7.46  
7.37  
7.36  
7.35  
7.33  
7.32

2.46  
2.44  
2.42  
1.59  
1.58  
1.57  
1.57  
0.92  
0.90

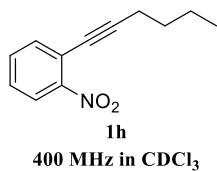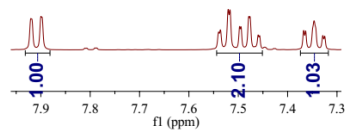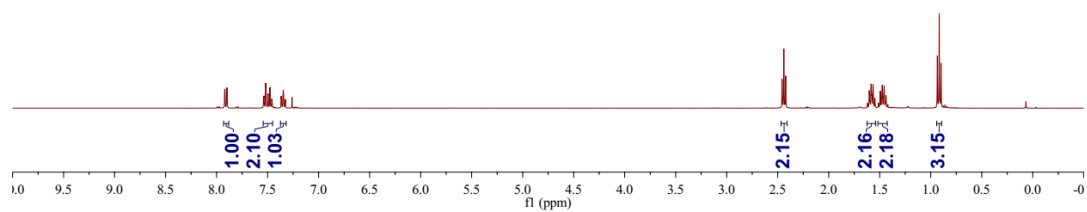

150.1  
134.8  
132.6  
127.9  
124.4  
119.4  
99.4  
76.0  
30.4  
22.0  
19.5  
13.6

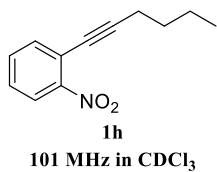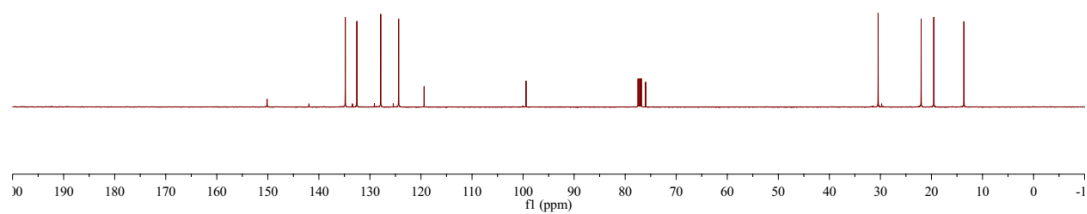



7.96  
7.94  
7.94  
7.55  
7.54  
7.53  
7.52  
7.51  
7.51  
7.49  
7.49  
7.47  
7.47  
7.38  
7.37  
7.36  
7.36  
7.35  
7.34  
7.33

1.53  
1.52  
1.51  
1.51  
1.50  
1.50  
1.49  
1.48  
1.47  
0.94  
0.93  
0.92  
0.91  
0.90  
0.89  
0.88

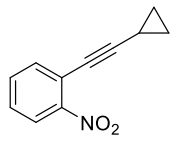

**1i**  
400 MHz in CDCl<sub>3</sub>

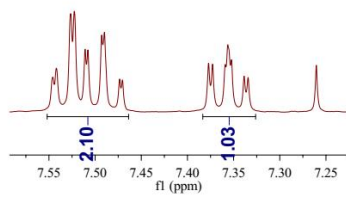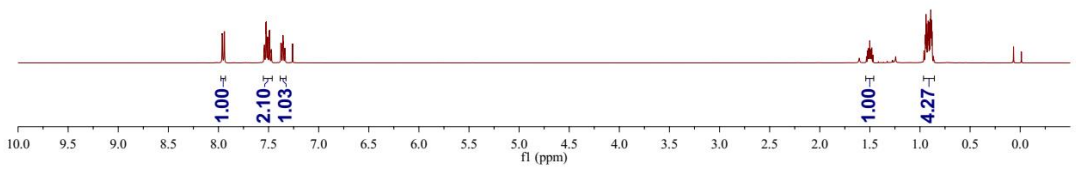

150.1  
134.7  
132.7  
127.7  
124.5  
119.5  
102.8  
71.3  
9.3  
0.8

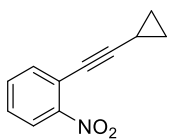

**1i**  
101 MHz in CDCl<sub>3</sub>

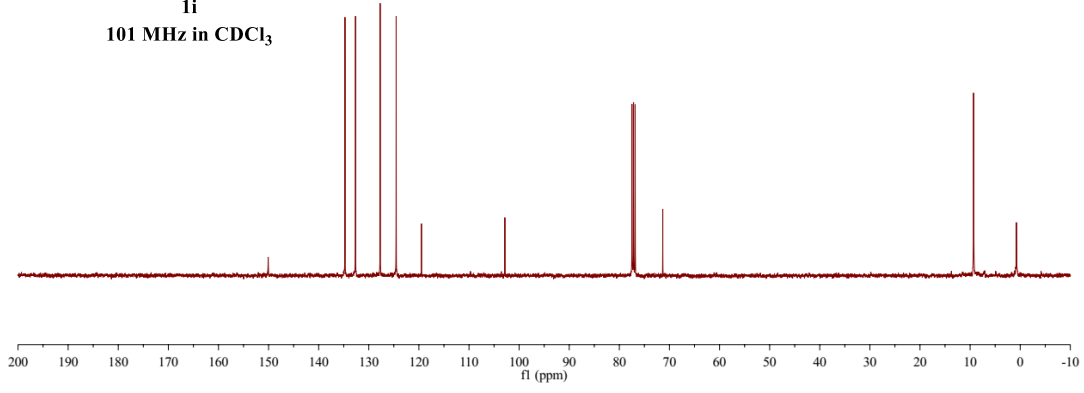

7.69  
7.68  
7.67  
7.66  
7.65  
7.64  
7.63  
7.62  
7.60  
7.39  
7.39  
7.37  
7.36  
7.36  
7.30  
7.29  
7.28  
7.27  
7.27  
7.26  
7.25  
7.25  
7.24  
7.23  
7.23  
7.22  
7.22  
7.19  
7.18  
7.18  
7.17  
7.16  
7.15  
7.13  
7.13  
7.12  
7.11  
7.11  
7.10  
7.09  
6.77

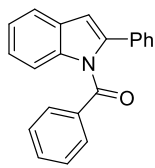

**3aa**

400 MHz in CDCl<sub>3</sub>

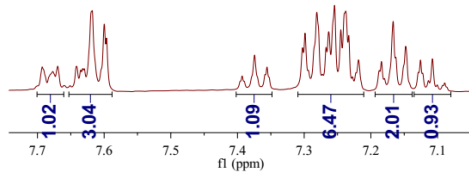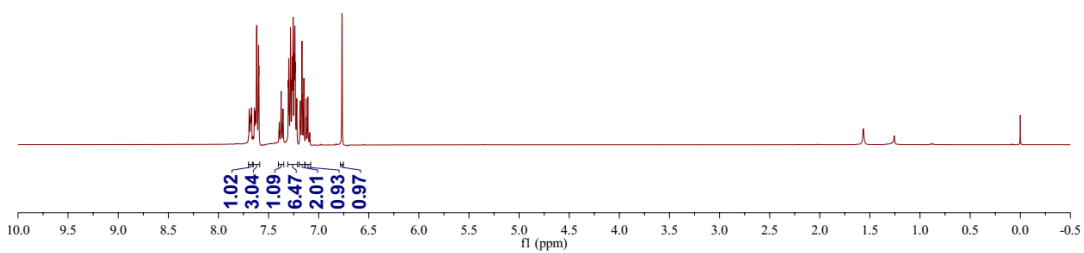

170.2  
141.4  
138.4  
135.2  
133.1  
132.9  
130.4  
129.4  
128.4  
128.3  
127.6  
124.3  
123.2  
120.8  
114.2  
109.5

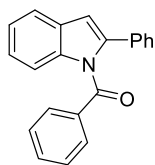

**3aa**

101 MHz in CDCl<sub>3</sub>

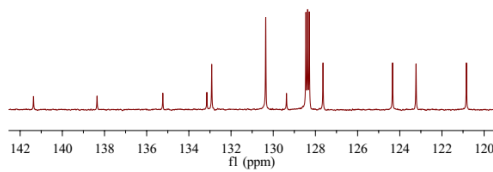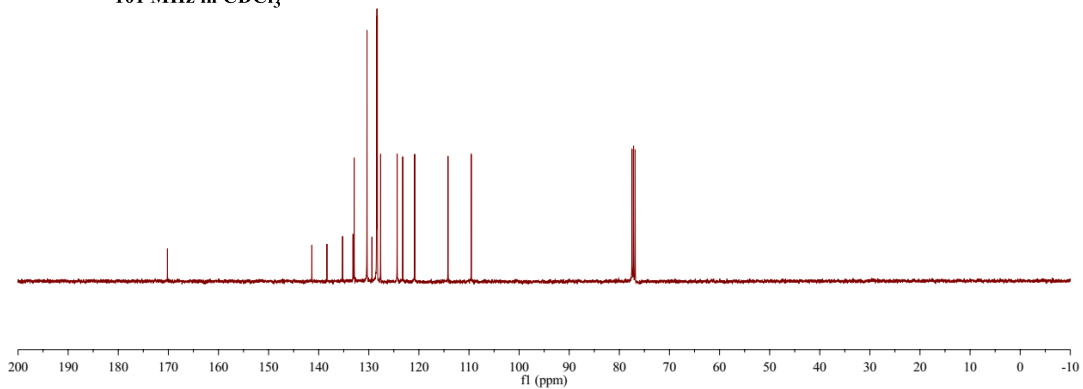

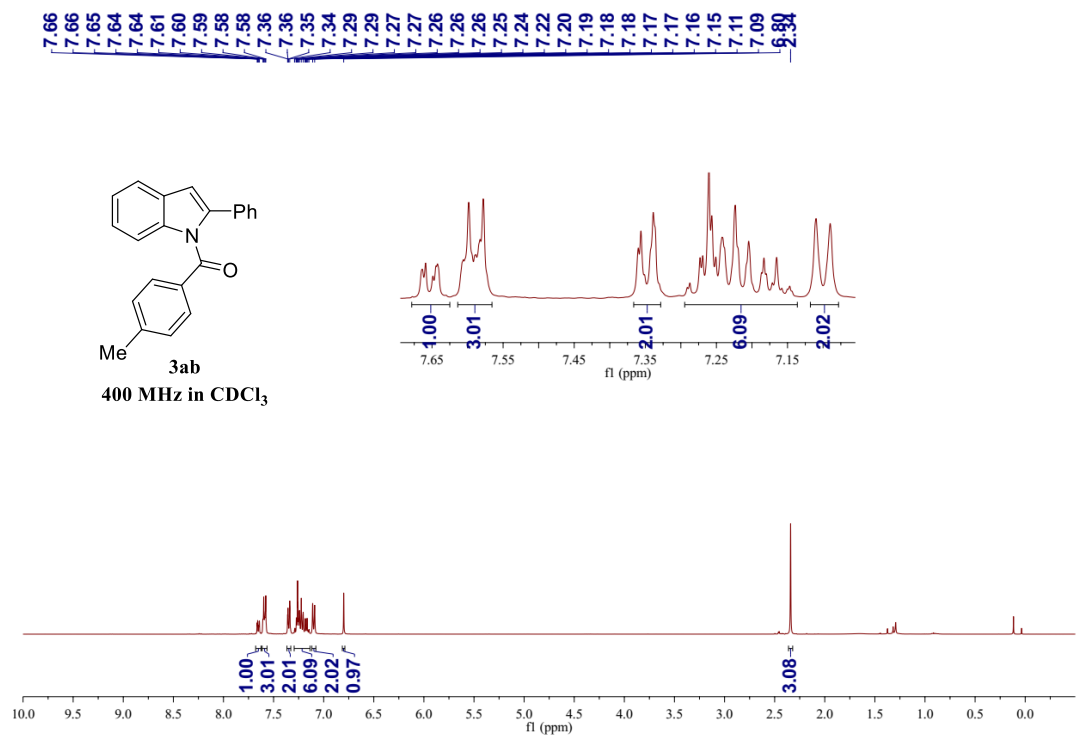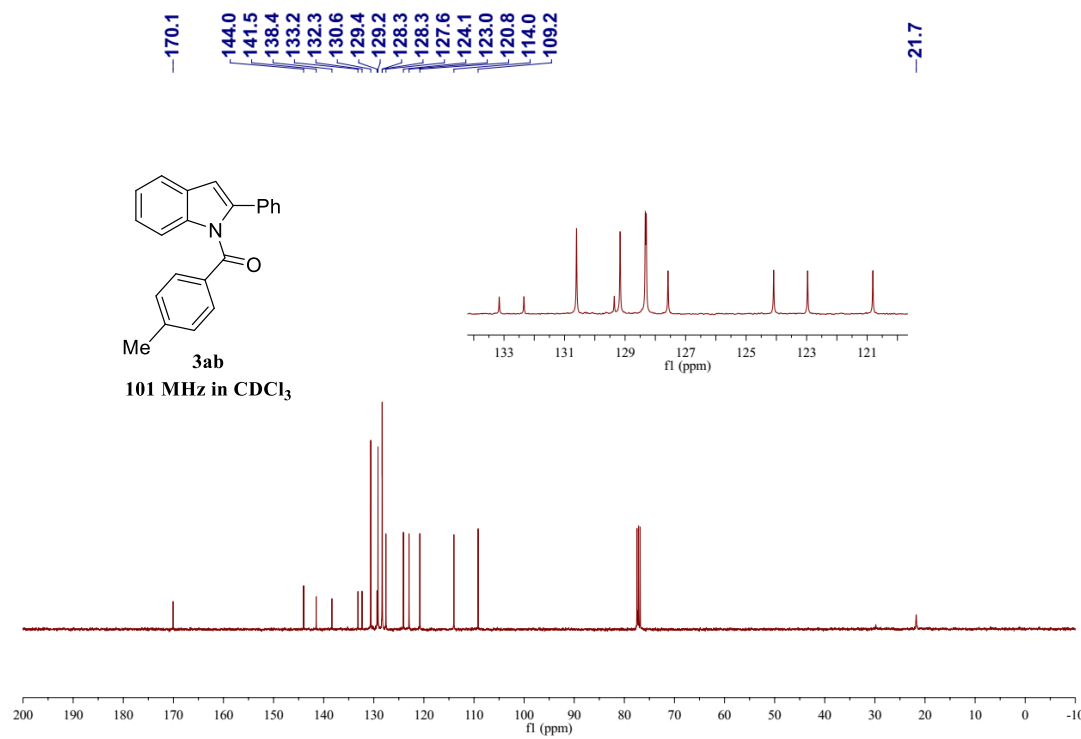

7.66  
7.66  
7.65  
7.64  
7.63  
7.61  
7.61  
7.59  
7.34  
7.32  
7.29  
7.29  
7.28  
7.27  
7.27  
7.26  
7.25  
7.23  
7.22  
7.21  
7.21  
7.19  
7.17  
7.16  
7.15  
7.12  
7.10  
6.80

2.66  
2.64  
2.60

1.21  
1.21  
1.19  
1.18  
1.17

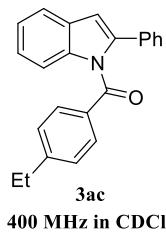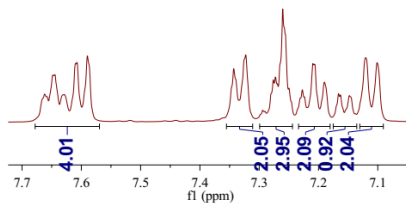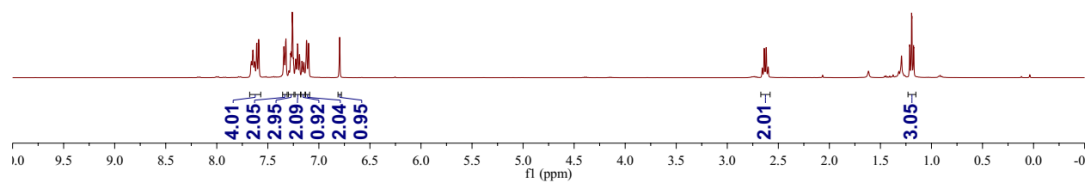

170.1  
141.5  
138.4  
133.2  
132.6  
130.7  
129.4  
128.4  
128.3  
128.0  
127.6  
124.1  
123.0  
120.8  
114.1  
109.2

29.1  
15.3

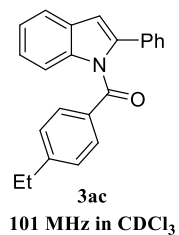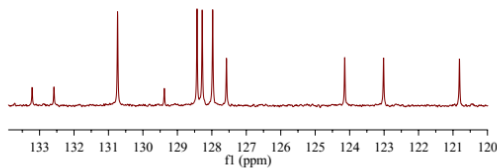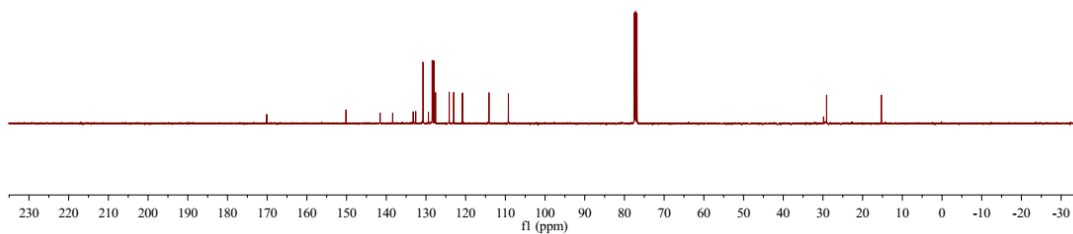

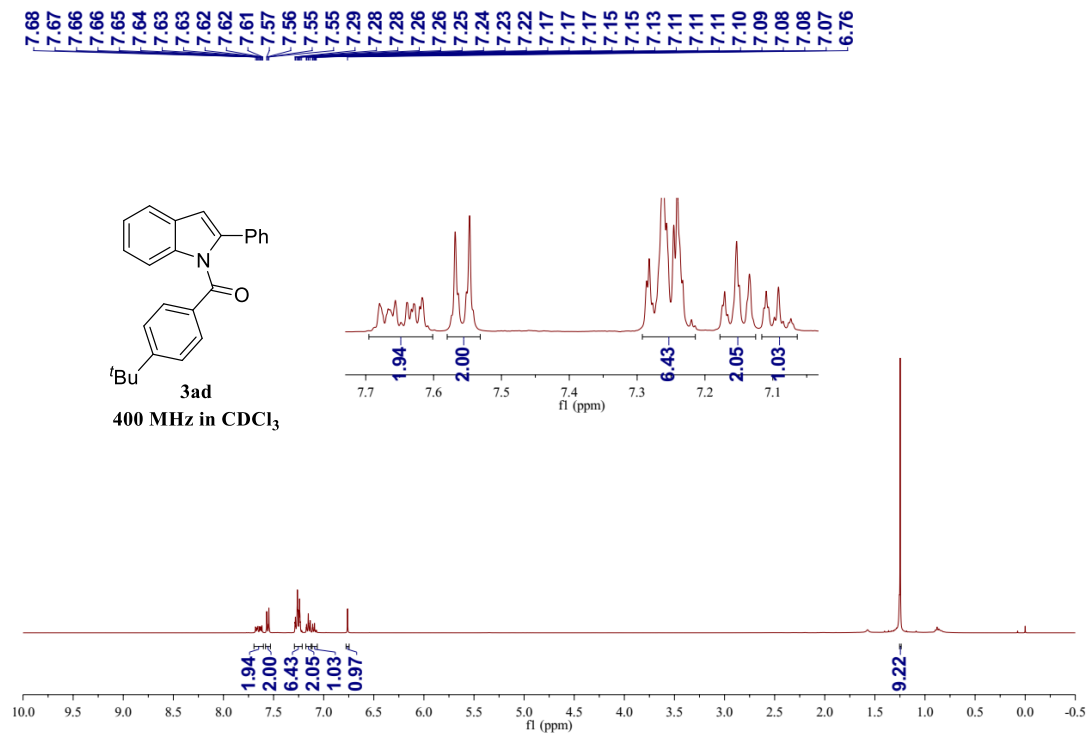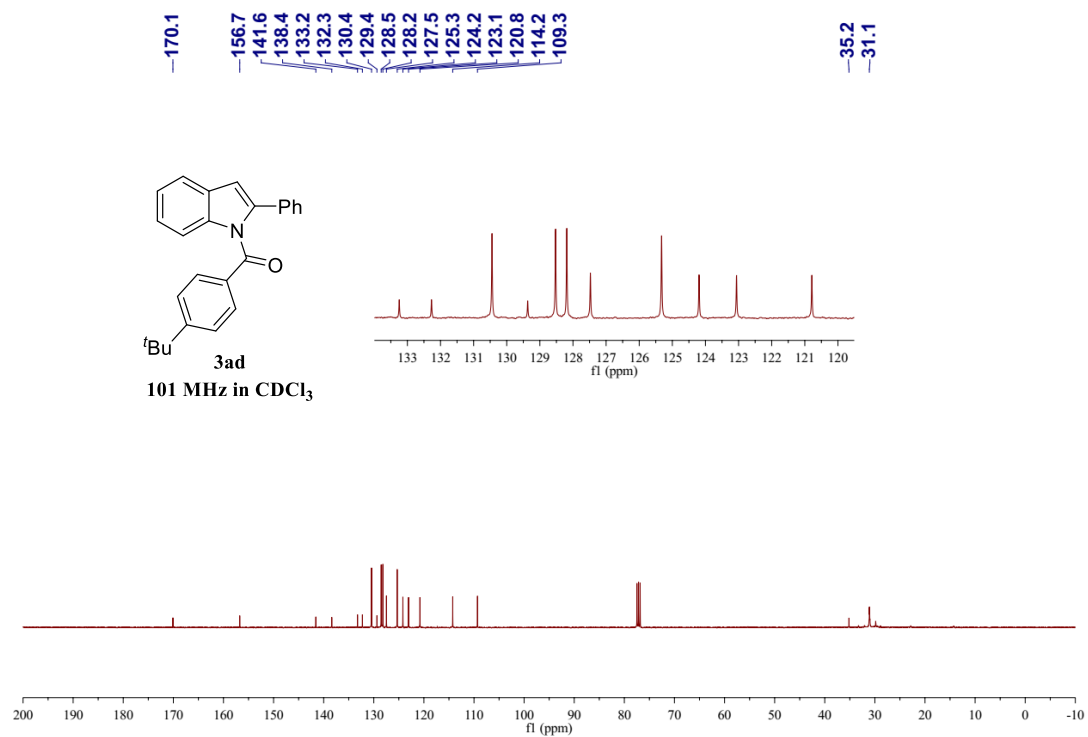

7.66  
7.65  
7.64  
7.64  
7.63  
7.61  
7.55  
7.54  
7.54  
7.34  
7.34  
7.32  
7.25  
7.23  
7.23  
7.22  
7.21  
7.19  
7.16  
7.15  
7.14  
6.77  
6.76  
6.75  
6.74

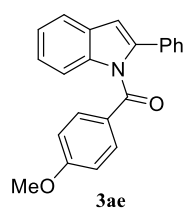

400 MHz in CDCl<sub>3</sub>

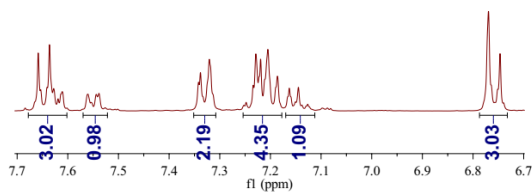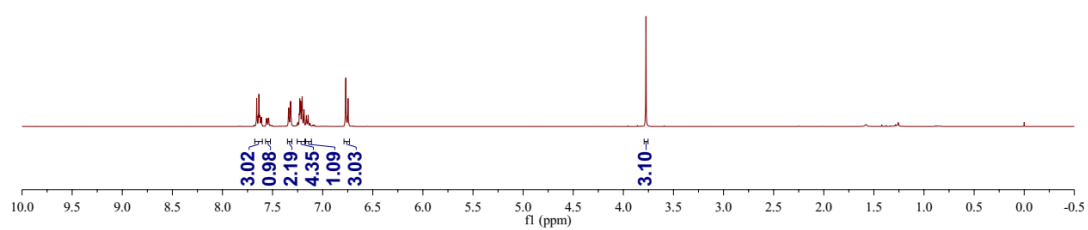

169.4  
163.6  
141.5  
138.4  
133.1  
132.9  
129.3  
128.3  
127.6  
127.3  
124.0  
122.8  
120.8  
113.8  
108.8  
55.6

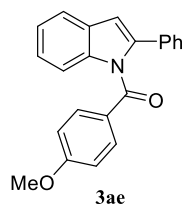

101 MHz in CDCl<sub>3</sub>

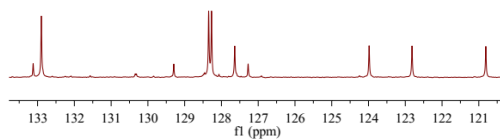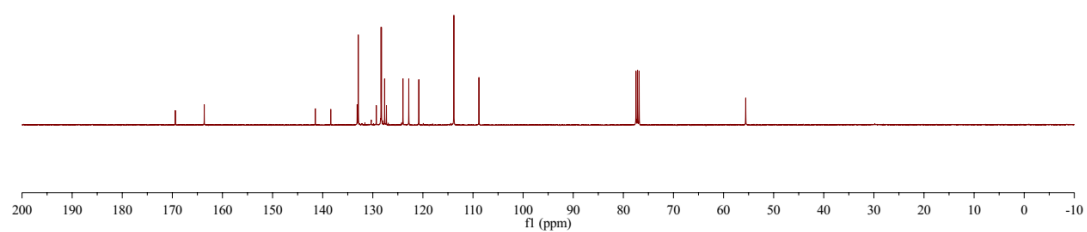

7.77  
7.76  
7.76  
7.75  
7.75  
7.66  
7.66  
7.65  
7.65  
7.64  
7.63  
7.63  
7.62  
7.61  
7.61  
7.31  
7.30  
7.29  
7.29  
7.28  
7.28  
7.26  
7.22  
7.21  
7.20  
7.18  
7.17  
7.17  
7.16  
7.15  
7.15  
6.94  
6.92  
6.89  
6.79

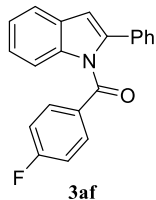

400 MHz in CDCl<sub>3</sub>

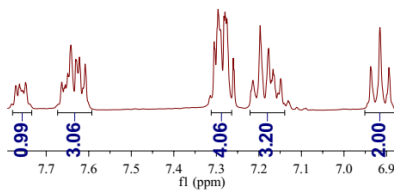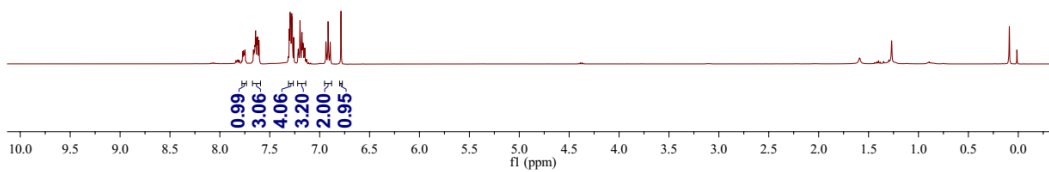

169.0  
166.7  
164.1  
141.1  
138.3  
133.0  
132.9  
131.5  
129.3  
128.5  
128.4  
127.8  
124.5  
123.4  
120.9  
115.7  
115.5  
114.1  
109.6

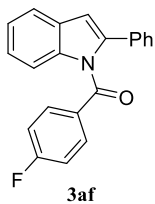

101 MHz in CDCl<sub>3</sub>

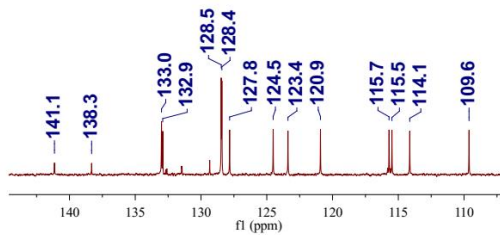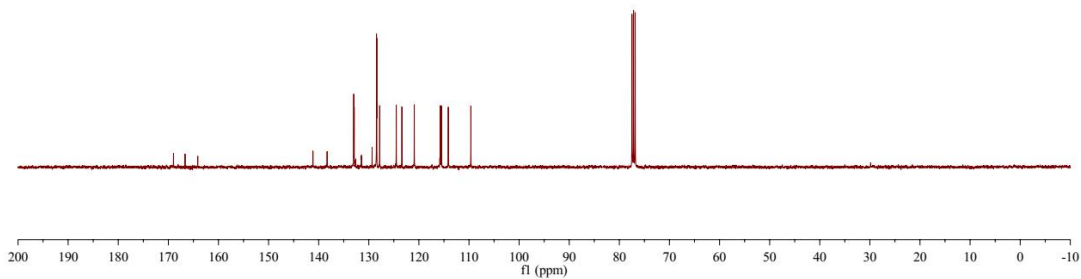

7.80  
7.79  
7.78  
7.77  
7.76  
7.68  
7.67  
7.66  
7.66  
7.65  
7.64  
7.56  
7.55  
7.55  
7.54  
7.53  
7.53  
7.33  
7.32  
7.31  
7.30  
7.30  
7.28  
7.28  
7.27  
7.23  
7.22  
7.21  
7.19  
7.18  
7.18  
7.17  
7.17  
7.16  
7.15  
7.14  
7.13  
6.79

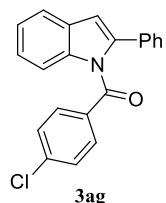

400 MHz in CDCl<sub>3</sub>

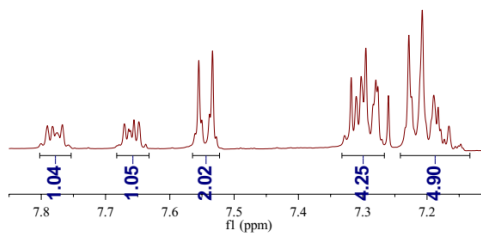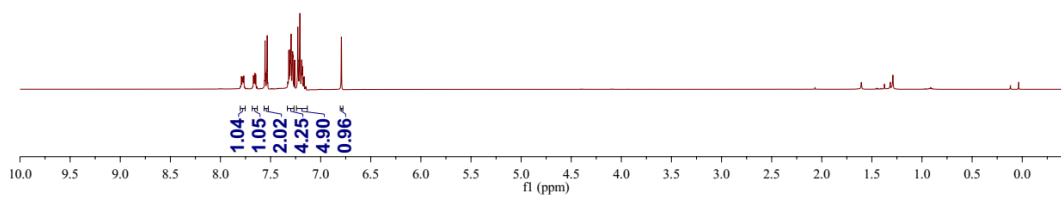

169.1  
141.1  
139.2  
138.2  
133.6  
132.9  
131.7  
129.4  
128.7  
128.5  
128.4  
127.9  
124.6  
123.5  
120.9  
114.2  
109.8

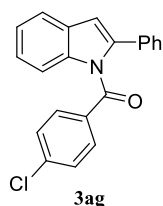

101 MHz in CDCl<sub>3</sub>

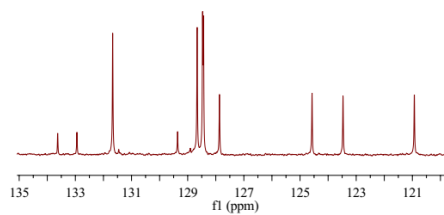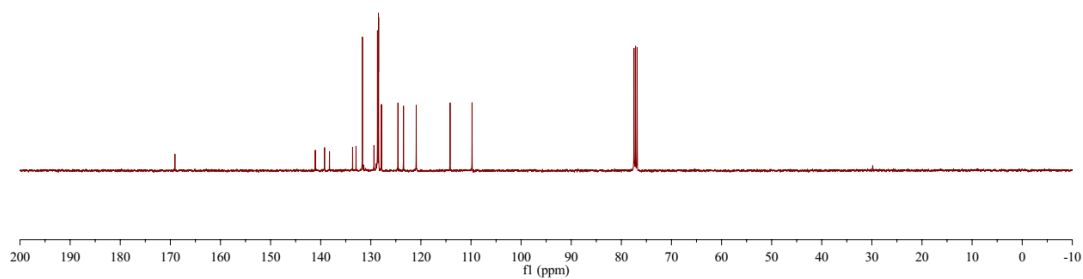



7.91  
7.90  
7.89  
7.88  
7.86  
7.66  
7.66  
7.65  
7.65  
7.64  
7.63  
7.45  
7.43  
7.35  
7.34  
7.33  
7.32  
7.31  
7.31  
7.31  
7.30  
7.25  
7.23  
7.23  
7.22  
7.21  
7.21  
7.20  
7.16  
7.16  
7.15  
7.14  
7.14  
7.12  
7.11  
7.11  
7.10  
7.10  
6.78

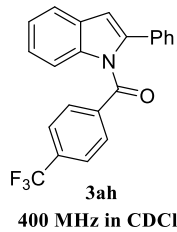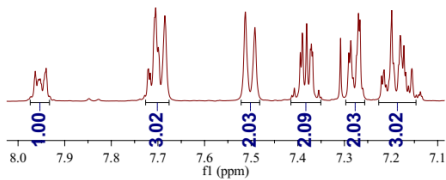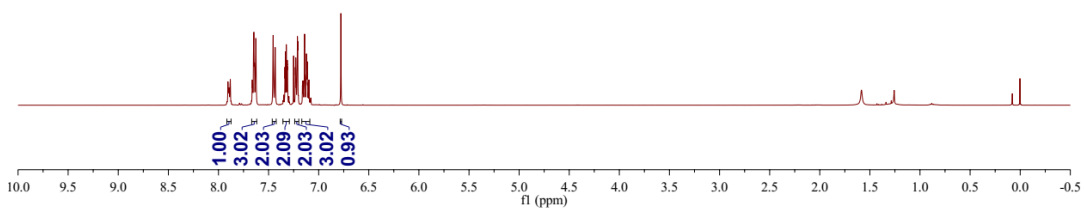

168.9  
140.9  
138.6  
138.3  
134.3  
134.0  
133.6  
133.3  
132.9  
130.5  
129.4  
128.7  
128.4  
128.0  
127.5  
125.2  
125.2  
125.1  
124.9  
123.9  
122.1  
121.0  
119.4  
117.4  
114.5  
110.4

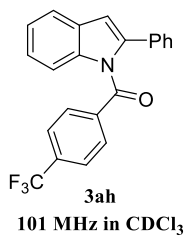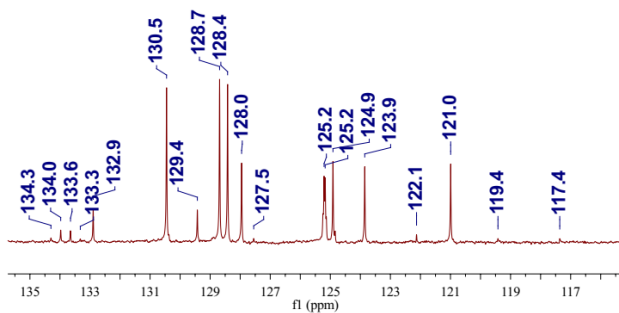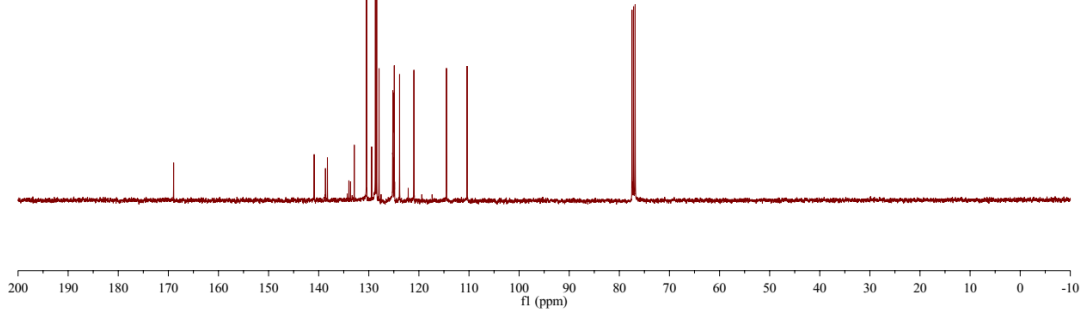

7.76  
7.74  
7.73  
7.71  
7.69  
7.68  
7.67  
7.66  
7.55  
7.53  
7.50  
7.48  
7.46  
7.44  
7.42  
7.40  
7.38  
7.36  
7.34  
7.32  
7.30  
7.30  
7.29  
7.28  
7.27  
7.26  
7.22  
7.21  
7.19  
7.15  
7.13  
7.12

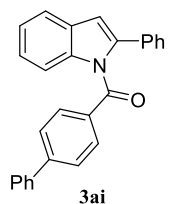

400 MHz in CDCl<sub>3</sub>

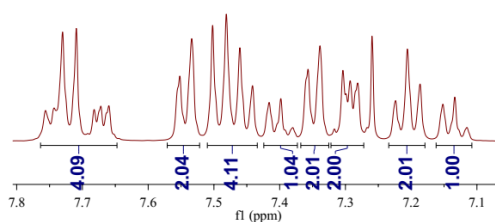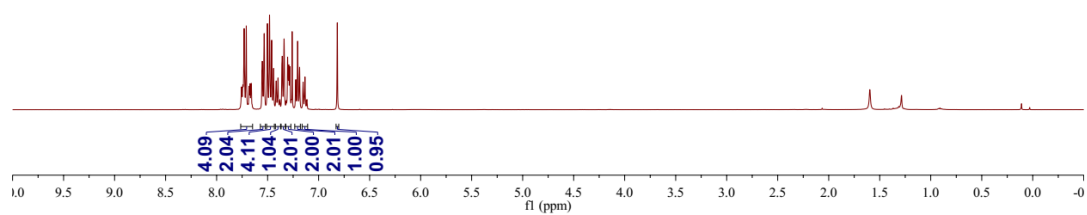

169.9  
145.6  
141.4  
139.9  
138.4  
133.8  
133.2  
131.0  
129.4  
129.1  
128.5  
128.4  
128.3  
127.7  
127.3  
127.0  
124.3  
123.2  
120.9  
114.2  
109.5

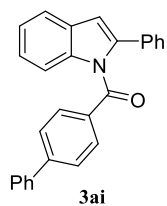

101 MHz in CDCl<sub>3</sub>

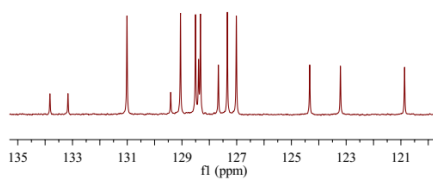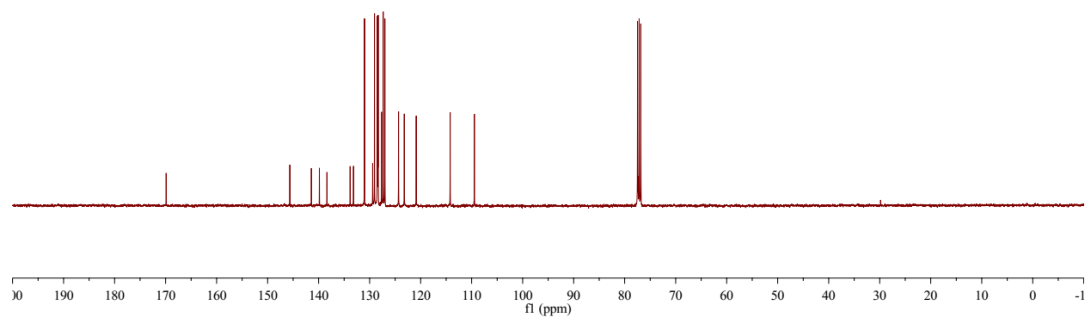

7.69  
7.68  
7.67  
7.64  
7.63  
7.62  
7.46  
7.44  
7.39  
7.30  
7.28  
7.26  
7.25  
7.24  
7.24  
7.19  
7.18  
7.16  
7.14  
7.13  
7.12  
7.11  
7.10  
6.76

-2.24

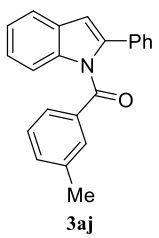

400 MHz in CDCl<sub>3</sub>

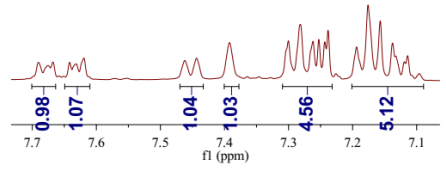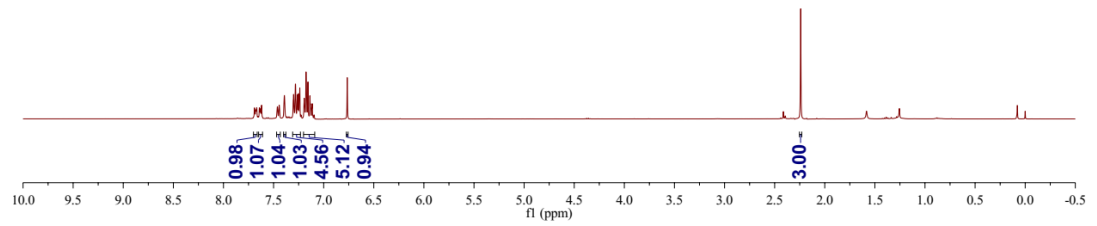

170.3  
141.4  
138.4  
138.1  
135.0  
133.7  
133.3  
131.0  
129.3  
128.4  
128.2  
127.6  
124.3  
123.2  
120.8  
114.2  
109.5

-21.2

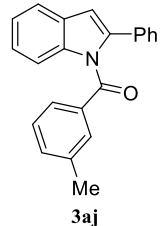

101 MHz in CDCl<sub>3</sub>

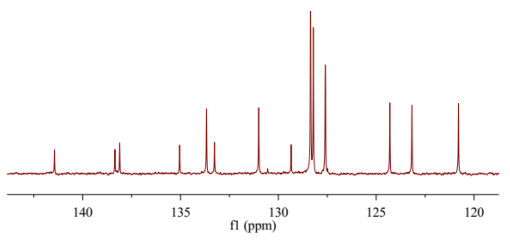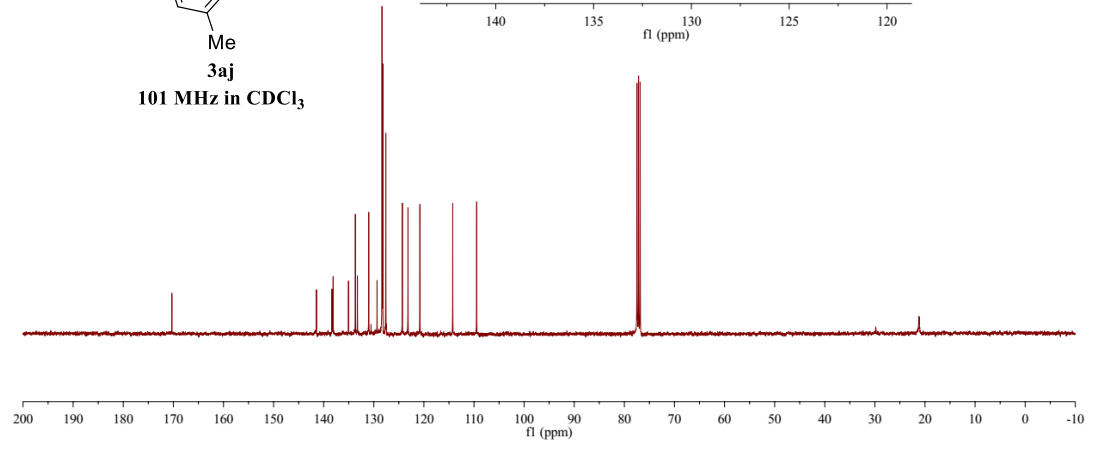

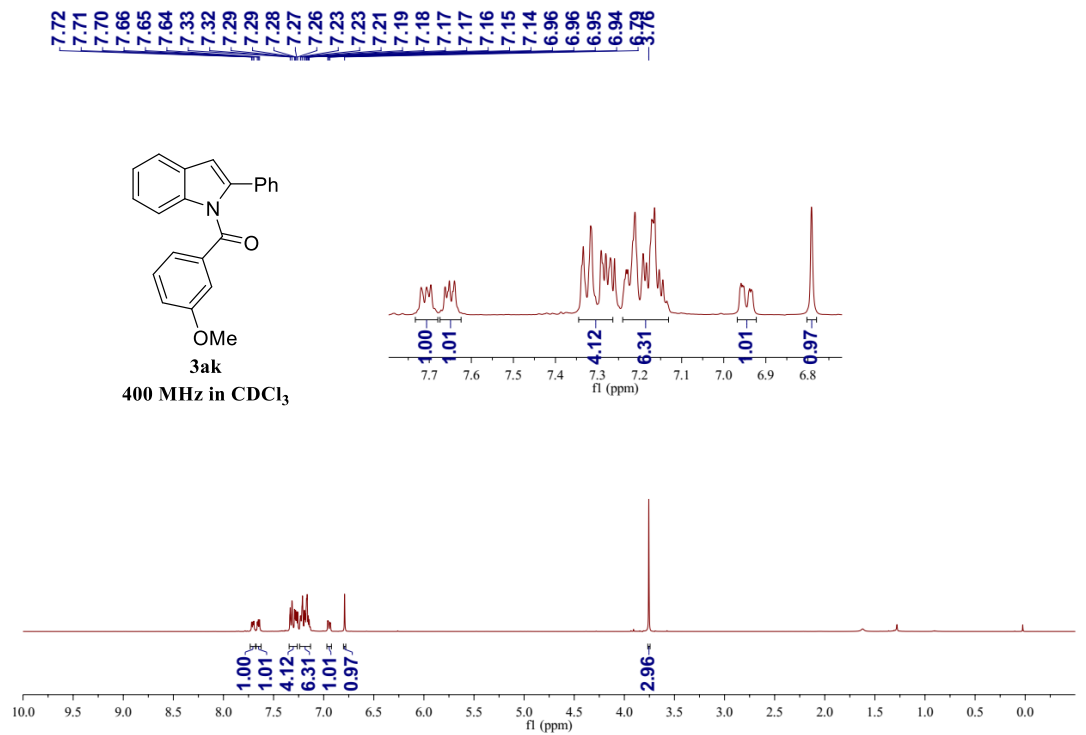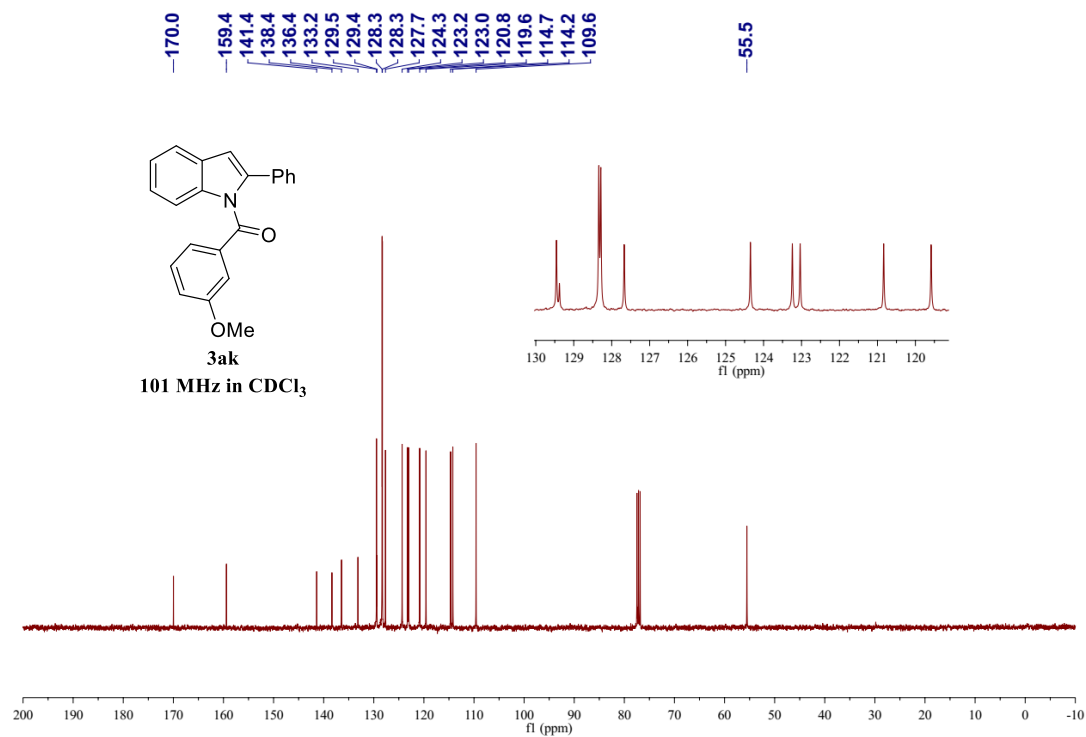

7.83  
7.82  
7.81  
7.65  
7.64  
7.63  
7.63  
7.62  
7.35  
7.33  
7.32  
7.30  
7.30  
7.29  
7.29  
7.28  
7.27  
7.27  
7.25  
7.25  
7.24  
7.24  
7.24  
7.19  
7.19  
7.18  
7.18  
7.17  
7.17  
7.16  
7.15  
7.14  
7.13  
7.12  
7.11  
7.05  
7.04  
7.03  
7.02  
7.01  
6.56 H<sub>2</sub>O

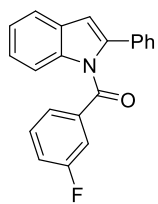

**3al**  
400 MHz in CDCl<sub>3</sub>

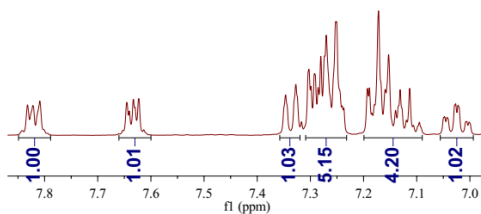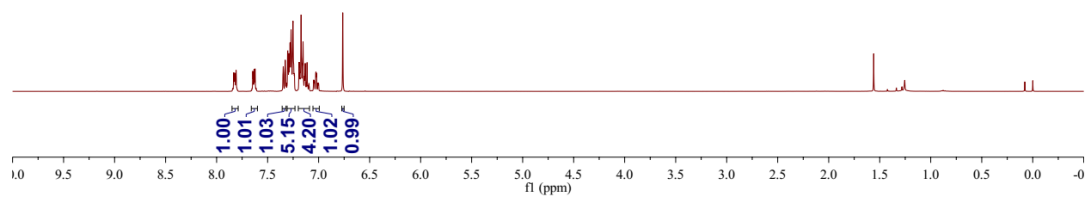

168.9  
163.4  
161.0  
141.0  
138.3  
137.4  
137.3  
133.1  
130.0  
129.4  
128.5  
128.4  
127.8  
126.1  
126.0  
124.7  
123.6  
120.9  
119.8  
119.6  
117.3  
117.0  
114.3  
110.0

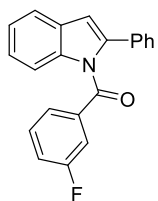

**3al**  
101 MHz in CDCl<sub>3</sub>

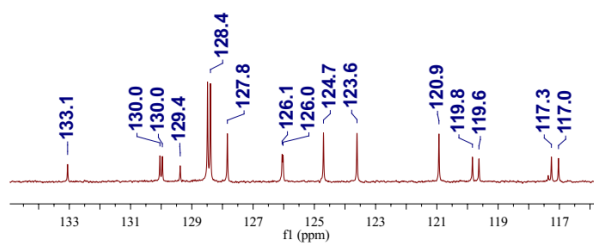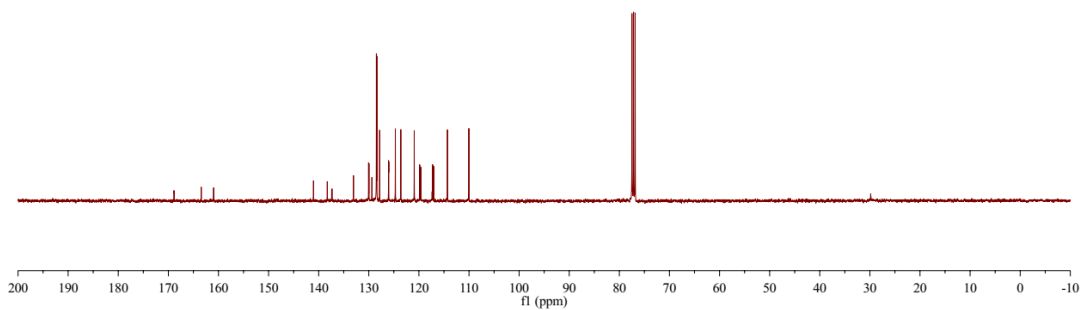

7.89  
7.89  
7.87  
7.67  
7.66  
7.65  
7.64  
7.50  
7.50  
7.48  
7.46  
7.35  
7.33  
7.33  
7.32  
7.31  
7.31  
7.29  
7.28  
7.26  
7.21  
7.19  
7.17  
7.15  
7.13  
7.11  
6.78

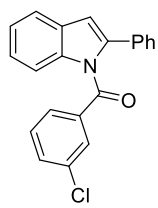

**3am**

400 MHz in CDCl<sub>3</sub>

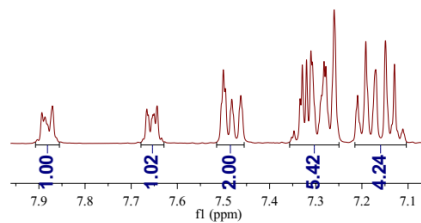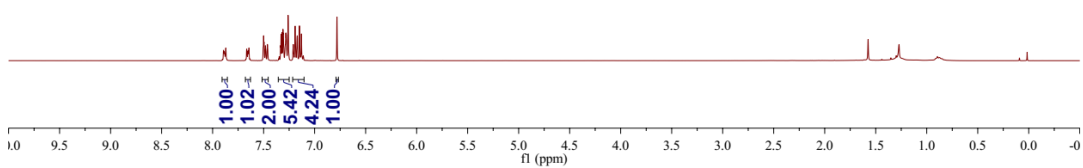

168.7  
141.0  
138.2  
136.9  
134.3  
133.0  
132.5  
130.3  
129.6  
129.4  
128.5  
128.4  
128.3  
127.9  
124.8  
123.7  
120.9  
114.4  
110.1

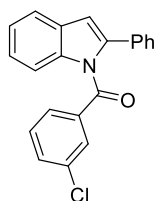

**3am**

101 MHz in CDCl<sub>3</sub>

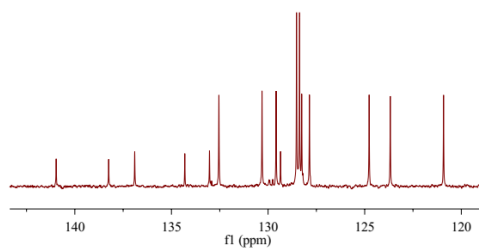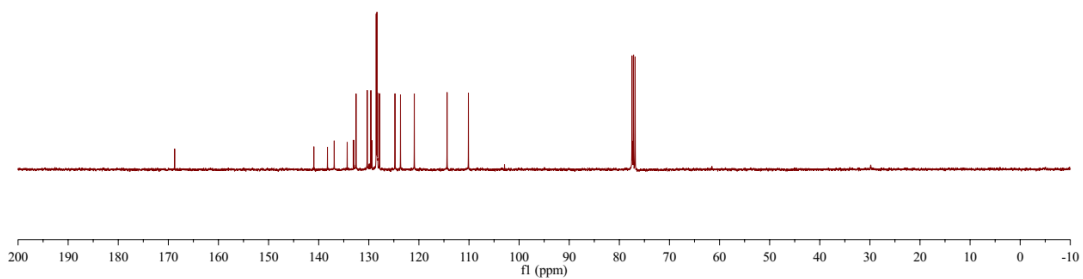

8.05  
8.04  
8.02  
7.78  
7.76  
7.71  
7.69  
7.68  
7.67  
7.55  
7.53  
7.38  
7.36  
7.36  
7.36  
7.35  
7.34  
7.34  
7.33  
7.32  
7.24  
7.24  
7.23  
7.22  
7.15  
7.15  
7.13  
7.13  
7.11  
7.10  
7.09  
7.08  
6.99 H<sub>2</sub>O

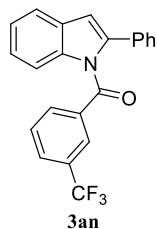

400 MHz in CDCl<sub>3</sub>

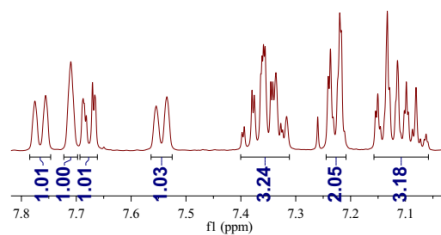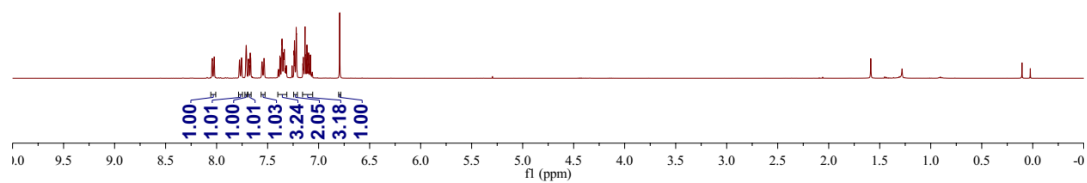

168.7  
140.7  
138.3  
136.2  
133.2  
132.9  
131.1  
130.7  
130.4  
130.1  
129.4  
128.9  
128.8  
128.8  
128.7  
128.4  
127.9  
127.5  
127.1  
127.1  
125.0  
124.8  
123.9  
122.1  
121.0  
119.4  
114.5  
110.4

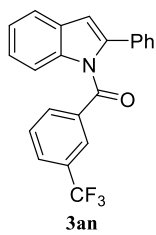

101 MHz in CDCl<sub>3</sub>

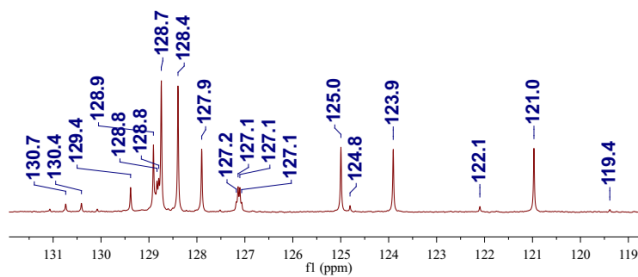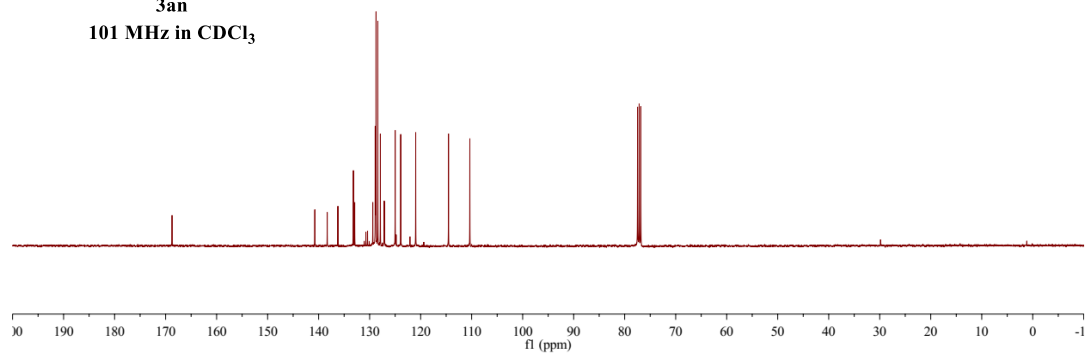

7.85  
7.84  
7.83  
7.83  
7.82  
7.82  
7.81  
7.77  
7.77  
7.67  
7.67  
7.66  
7.66  
7.65  
7.64  
7.62  
7.61  
7.60  
7.59  
7.58  
7.47  
7.45  
7.45  
7.43  
7.41  
7.38  
7.38  
7.37  
7.37  
7.36  
7.35  
7.33  
7.32  
7.31  
7.30  
7.30  
7.29  
7.28  
7.18  
7.16  
7.14  
7.12  
7.11  
7.11  
7.10  
7.09  
6.80

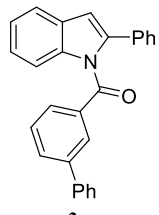

**3ao**  
400 MHz in CDCl<sub>3</sub>

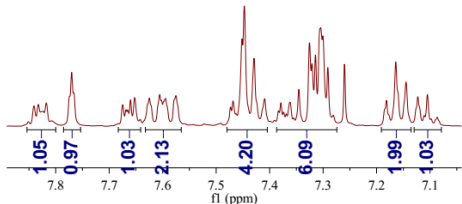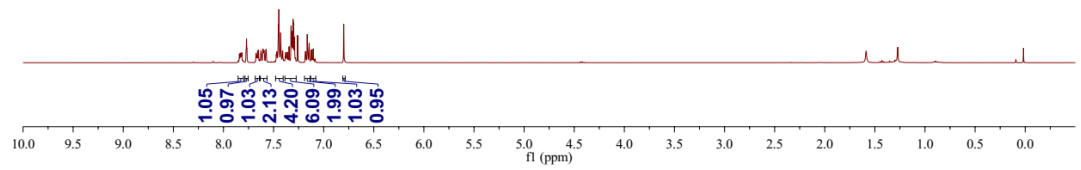

170.2  
141.4  
139.9  
138.4  
135.8  
133.1  
131.4  
129.4  
129.1  
129.0  
128.9  
128.5  
128.3  
127.9  
127.7  
127.2  
124.5  
123.4  
120.9  
114.3  
109.7

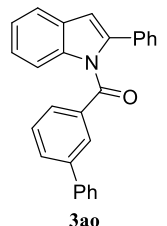

**3ao**  
101 MHz in CDCl<sub>3</sub>

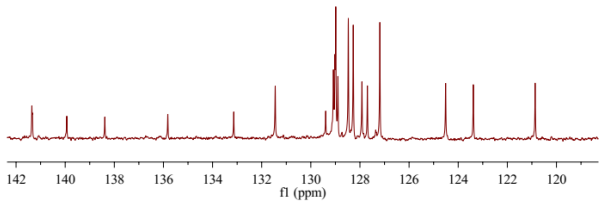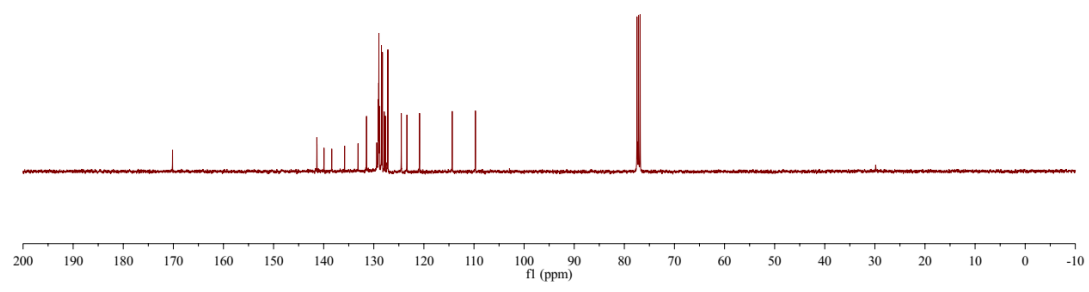



7.74  
7.73  
7.72  
7.72  
7.64  
7.64  
7.63  
7.62  
7.32  
7.30  
7.29  
7.28  
7.28  
7.27  
7.26  
7.21  
7.19  
7.18  
7.18  
7.17  
7.16  
7.14  
7.14  
7.13  
7.12  
7.07  
7.05  
7.03  
7.01  
6.99  
6.72

-2.37

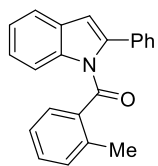

**3ap**  
400 MHz in CDCl<sub>3</sub>

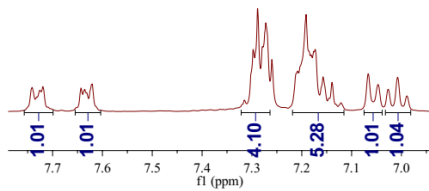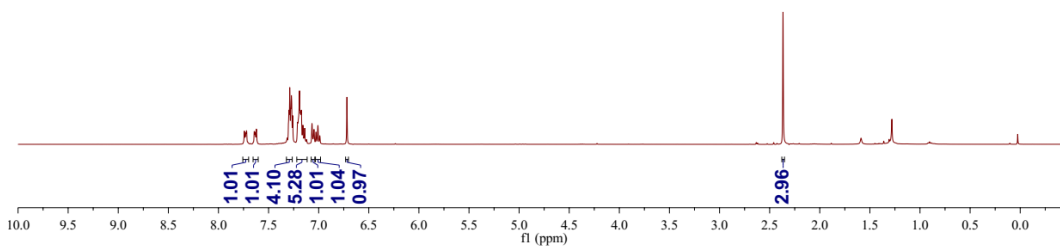

170.4  
141.2  
138.1  
138.0  
135.6  
133.4  
131.5  
131.1  
129.8  
129.5  
128.4  
128.0  
127.7  
125.6  
124.6  
123.5  
120.8  
114.5  
110.5

-19.7

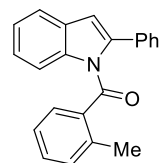

**3ap**  
101 MHz in CDCl<sub>3</sub>

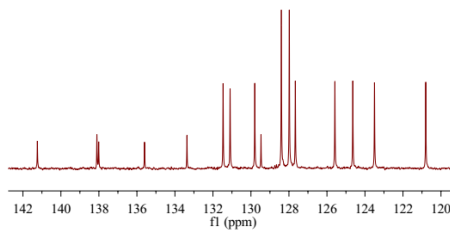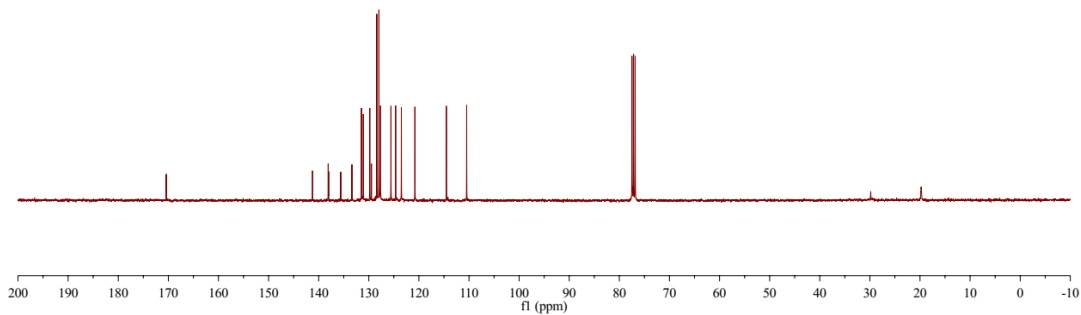

8.05  
8.03  
8.01  
8.00  
7.76  
7.75  
7.74  
7.73  
7.73  
7.67  
7.66  
7.66  
7.65  
7.65  
7.55  
7.53  
7.53  
7.51  
7.51  
7.49  
7.49  
7.47  
7.47  
7.45  
7.45  
7.34  
7.34  
7.33  
7.33  
7.32  
7.32  
7.23  
7.21  
7.21  
7.19  
7.09  
7.08  
7.08  
7.07  
6.91  
6.90  
6.89  
6.89  
6.88  
6.88  
6.87  
6.69

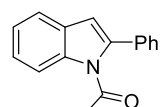

**3aq**  
400 MHz in CDCl<sub>3</sub>

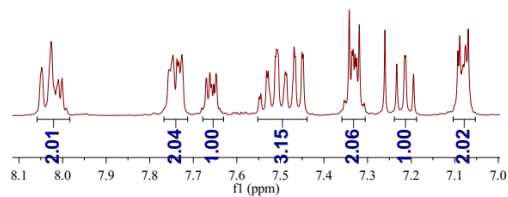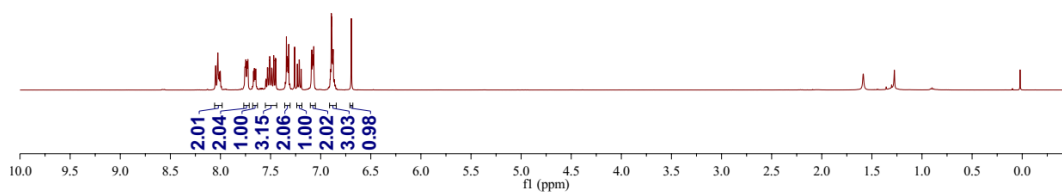

169.9  
141.5  
138.2  
133.4  
133.2  
133.0  
132.4  
131.0  
129.5  
129.3  
128.4  
128.3  
127.8  
127.6  
127.3  
126.5  
125.1  
124.8  
124.3  
123.7  
120.8  
115.1  
110.5

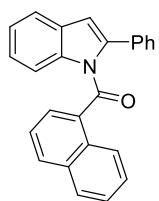

**3aq**  
101 MHz in CDCl<sub>3</sub>

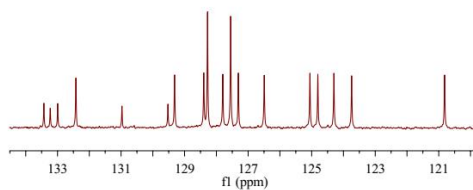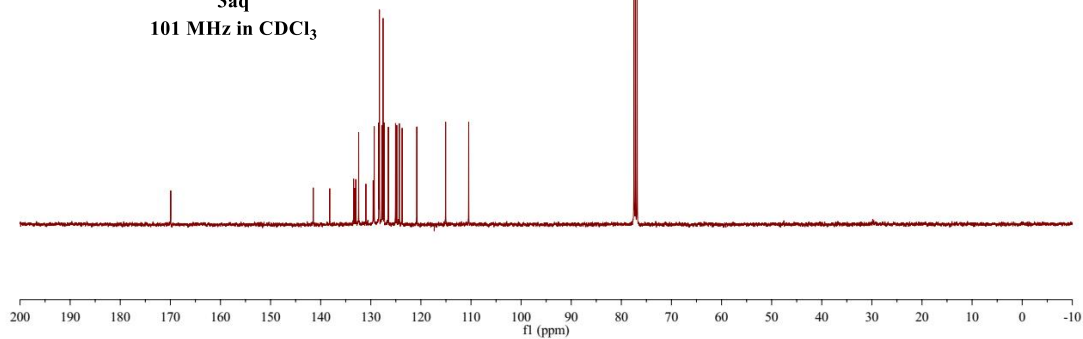

7.84  
7.83  
7.82  
7.82  
7.73  
7.72  
7.72  
7.66  
7.66  
7.65  
7.64  
7.64  
7.64  
7.35  
7.35  
7.34  
7.33  
7.32  
7.31  
7.31  
7.30  
7.30  
7.29  
7.28  
7.28  
7.26  
7.26  
7.25  
7.25  
7.23  
7.22  
7.22  
7.19  
7.19  
7.18  
7.17  
7.17  
7.16  
7.15  
7.13  
7.12  
7.12  
7.11  
6.79

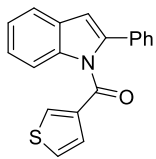

**3ar**  
400 MHz in CDCl<sub>3</sub>

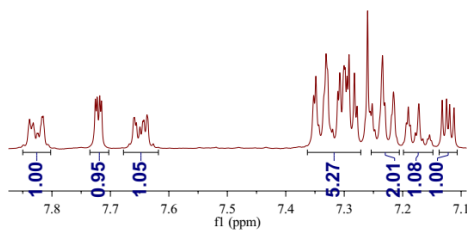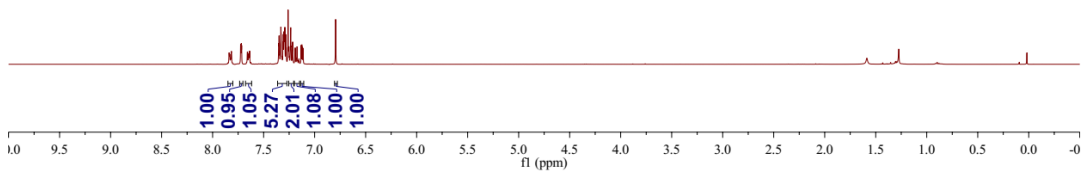

164.4  
140.9  
138.3  
137.8  
134.5  
133.2  
129.3  
128.5  
128.4  
128.2  
127.7  
126.2  
124.4  
123.2  
120.9  
114.0  
109.5

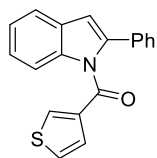

**3ar**  
101 MHz in CDCl<sub>3</sub>

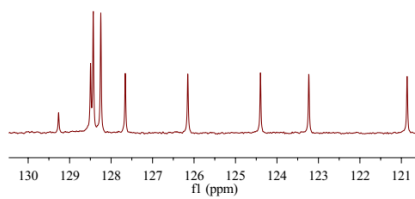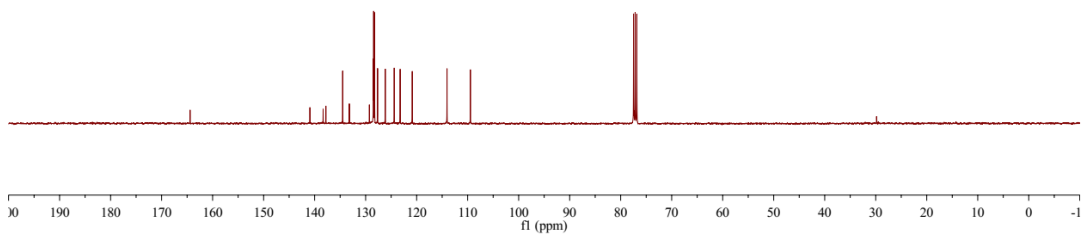

7.64  
7.62  
7.60  
7.59  
7.58  
7.43  
7.41  
7.39  
7.28  
7.26  
7.25  
7.24  
7.23  
7.23  
7.22  
7.21  
7.20  
7.18  
7.00  
6.98  
6.73

-2.24

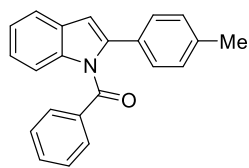

3ba

400 MHz in CDCl<sub>3</sub>

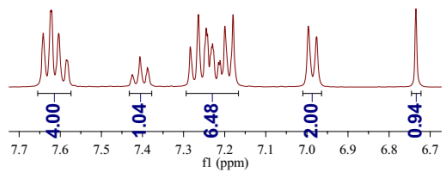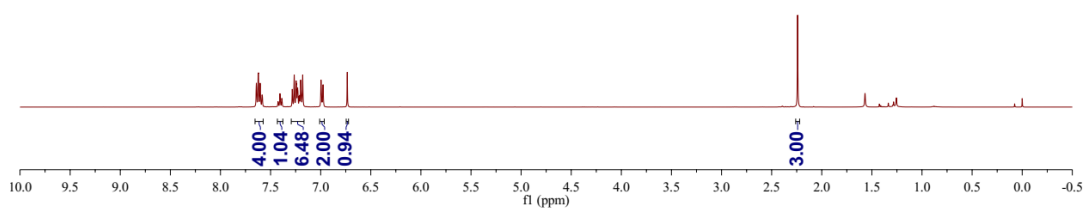

-170.3

141.6  
138.3  
137.5  
135.3  
132.9  
130.4  
130.3  
129.5  
129.0  
128.4  
128.3  
124.1  
123.1  
120.7  
114.1  
109.1

-21.3

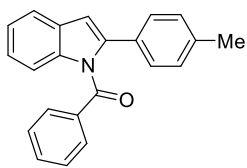

3ba

101 MHz in CDCl<sub>3</sub>

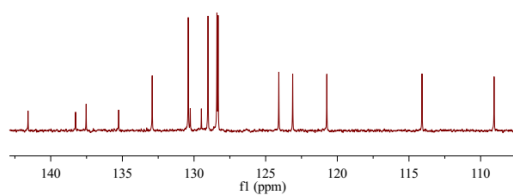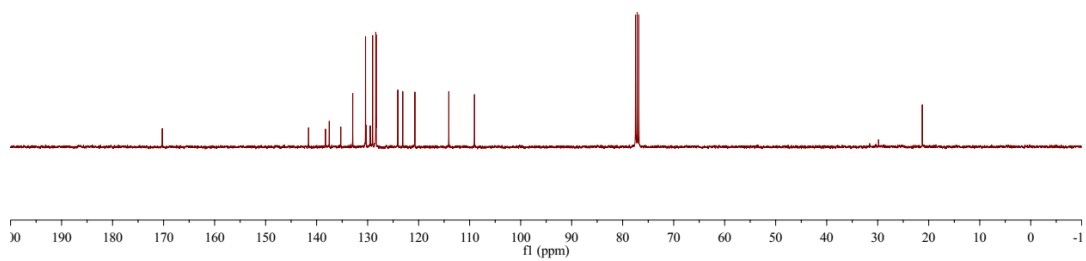

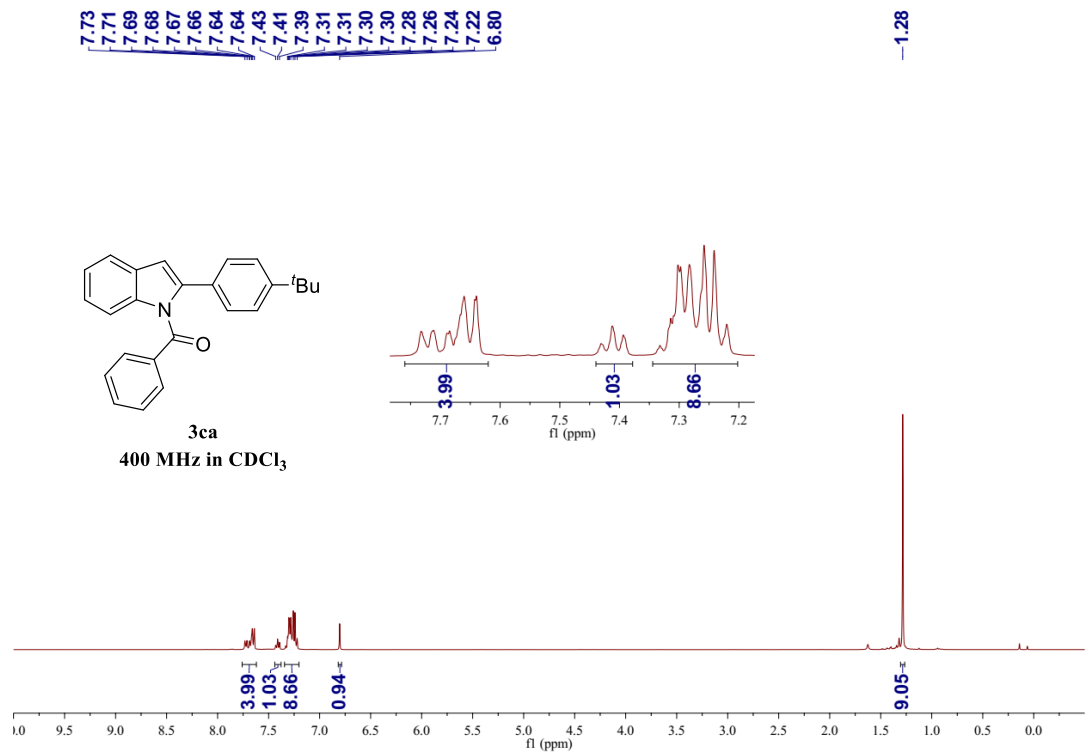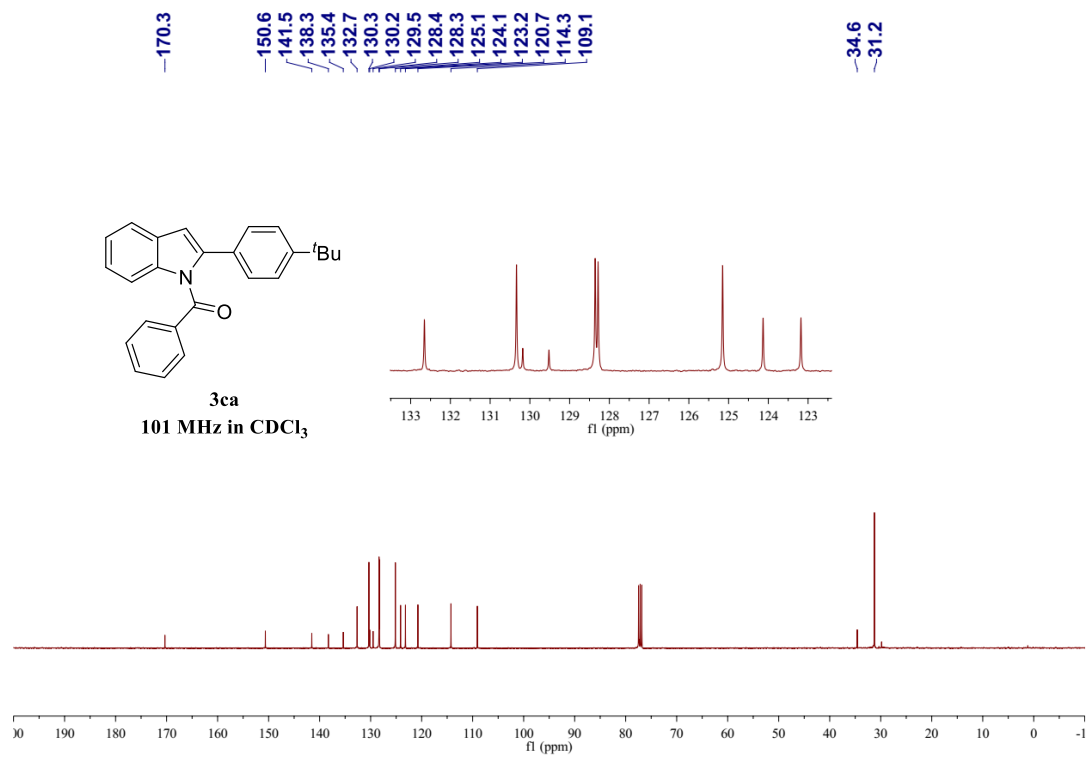

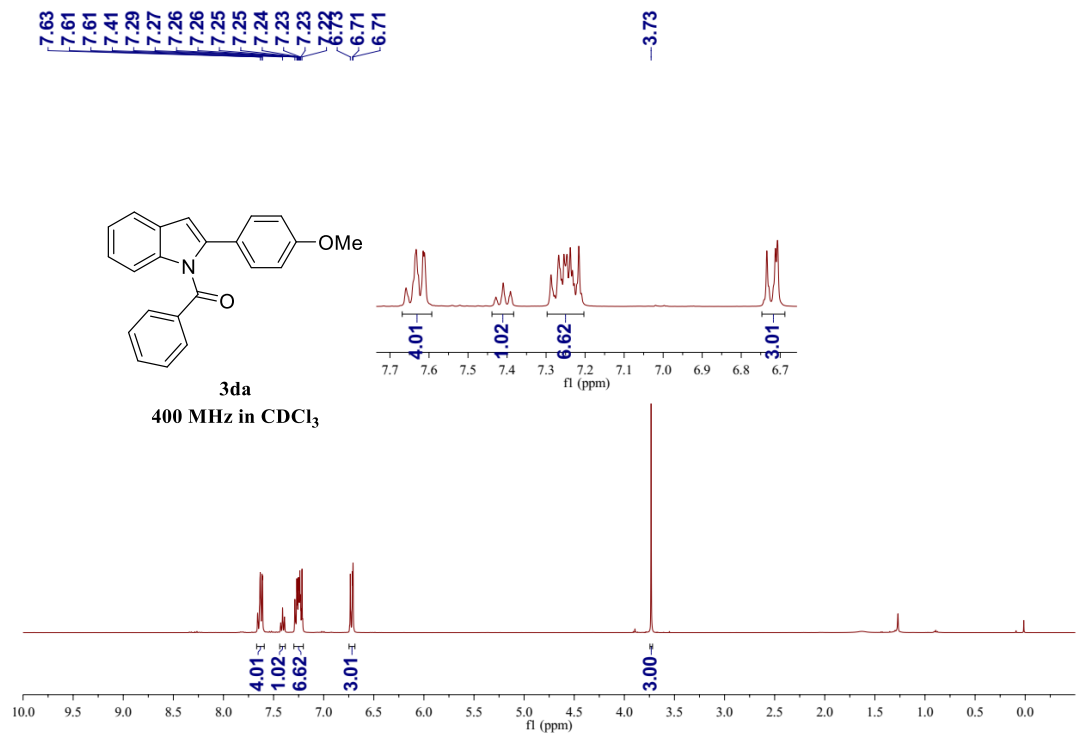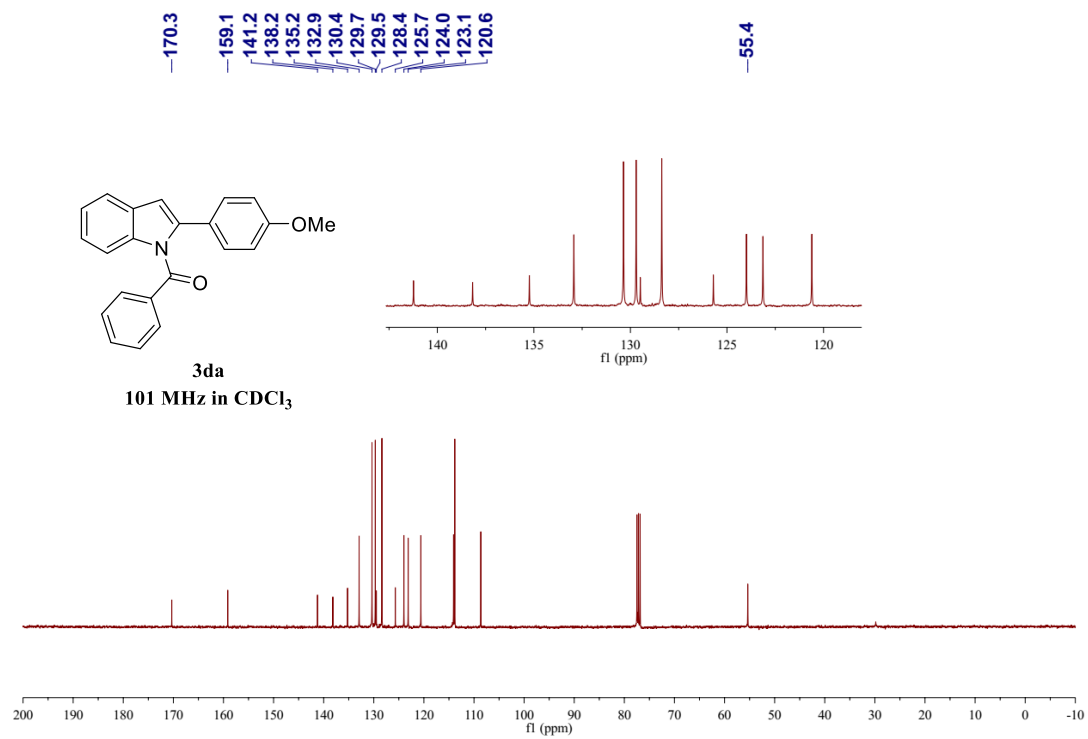

7.65  
7.63  
7.62  
7.60  
7.44  
7.43  
7.41  
7.29  
7.27  
7.26  
6.90  
6.88  
6.86  
6.74

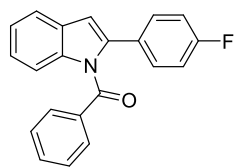

3ea

400 MHz in CDCl<sub>3</sub>

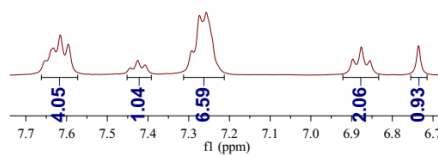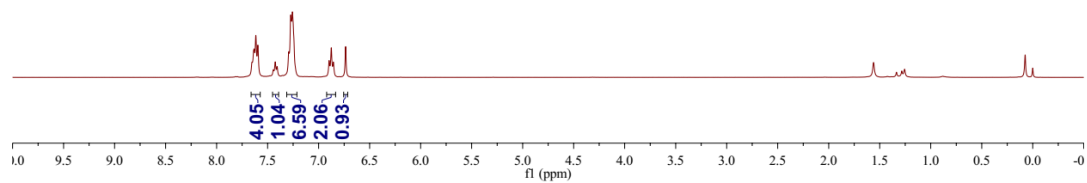

170.1  
163.5  
161.0  
140.3  
138.3  
135.2  
133.1  
130.3  
130.2  
130.1  
129.4  
129.4  
129.3  
128.5  
124.5  
123.3  
120.9  
115.5  
115.3  
114.2  
109.7

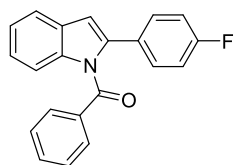

3ea

101 MHz in CDCl<sub>3</sub>

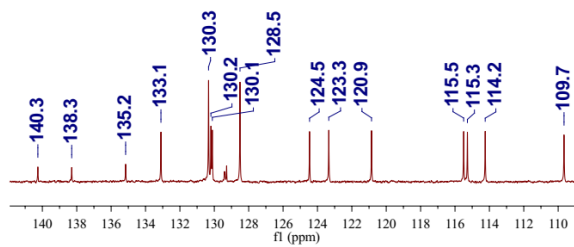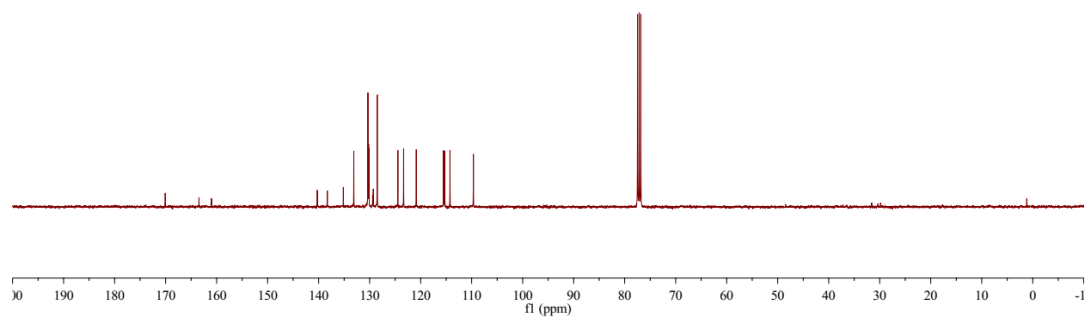

7.73  
7.72  
7.72  
7.71  
7.65  
7.64  
7.63  
7.63  
7.62  
7.60  
7.59  
7.40  
7.38  
7.37  
7.37  
7.28  
7.28  
7.28  
7.27  
7.26  
7.26  
7.25  
7.24  
7.23  
7.12  
7.10  
7.08  
7.06  
7.04  
6.93  
6.91  
6.77  
5.73

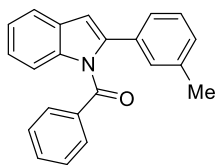

3fa

400 MHz in CDCl<sub>3</sub>

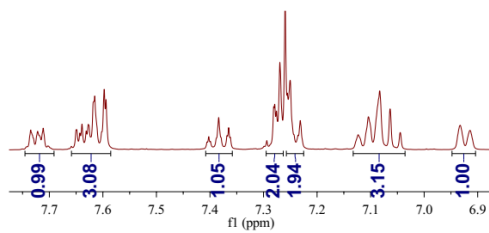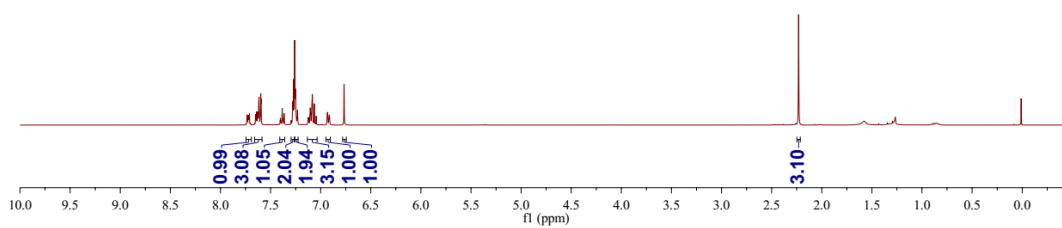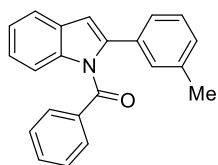

3fa

101 MHz in CDCl<sub>3</sub>

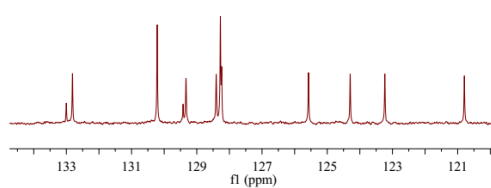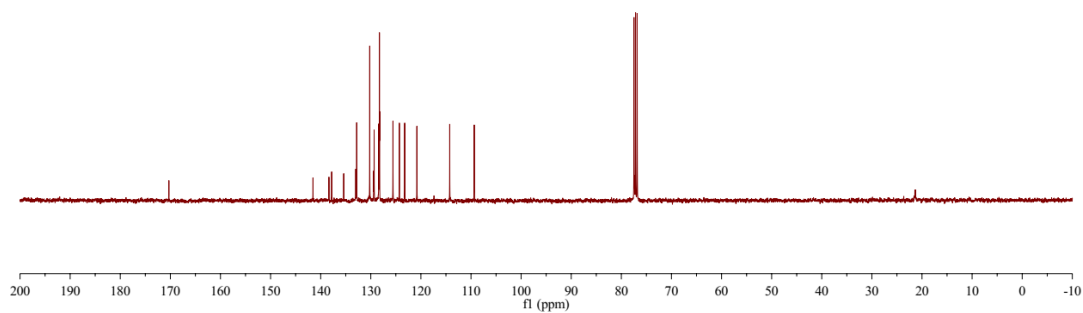



7.67  
7.66  
7.65  
7.63  
7.63  
7.46  
7.44  
7.42  
7.32  
7.30  
7.29  
7.29  
7.28  
7.27  
7.17  
7.16  
7.15  
7.14  
7.14  
7.12  
7.08  
7.06  
7.04  
7.03  
7.02  
7.01  
7.01  
6.86  
6.85  
6.83  
6.83  
6.81

-1.57 H<sub>2</sub>O

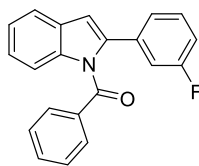

3ga  
400 MHz in CDCl<sub>3</sub>

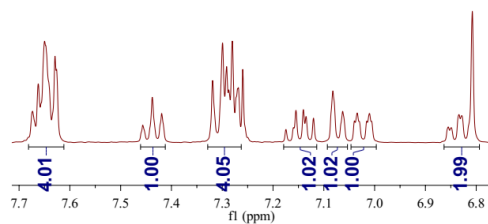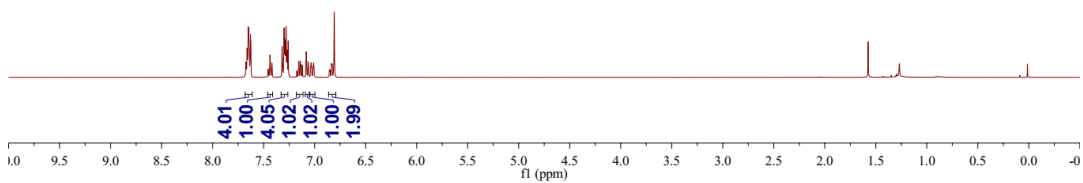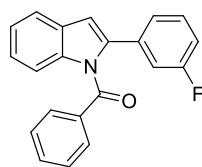

3ga  
101 MHz in CDCl<sub>3</sub>

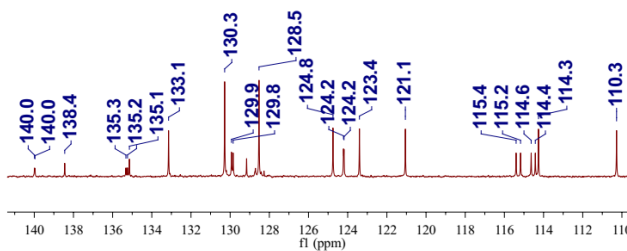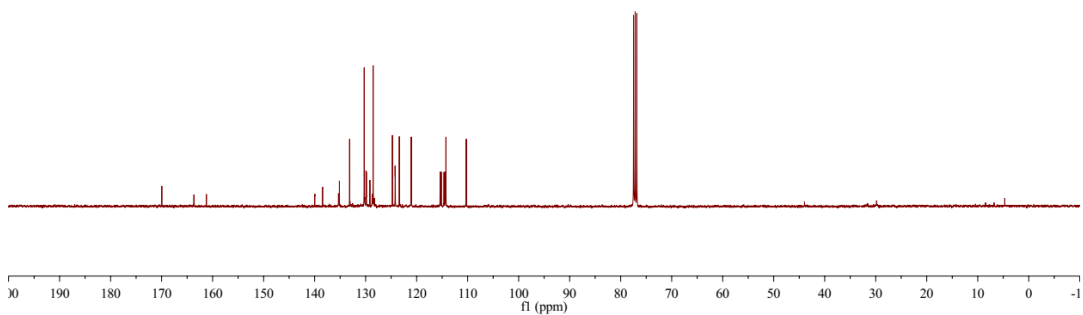

7.75  
7.73  
7.73  
7.66  
7.64  
7.63  
7.62  
7.52  
7.50  
7.48  
7.16  
7.15  
7.14  
7.12  
7.12  
7.02  
7.01  
6.99  
6.99  
6.98  
6.97  
6.88  
6.86  
6.49

2.87  
2.85  
2.83  
1.67  
1.66  
1.64  
1.62  
1.61  
1.60  
1.38  
1.36  
1.35  
1.33  
0.92  
0.90  
0.88

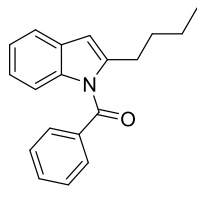

**3ha**  
400 MHz in CDCl<sub>3</sub>

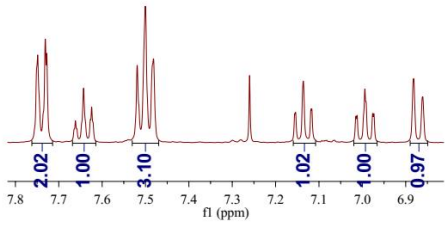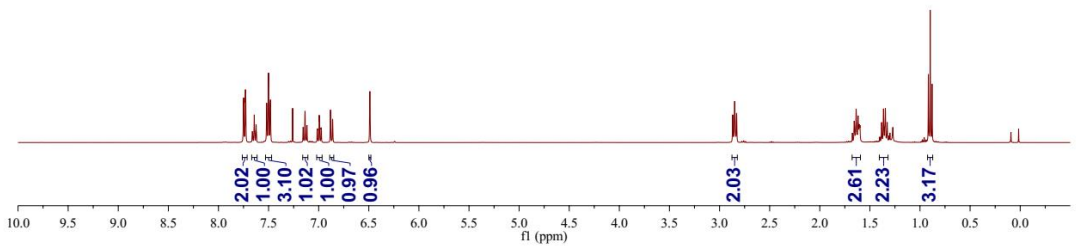

-170.1

143.2  
137.4  
135.6  
133.2  
130.0  
129.6  
128.9  
122.6  
122.5  
120.1  
114.2  
107.4

31.3  
28.7  
22.5  
14.0

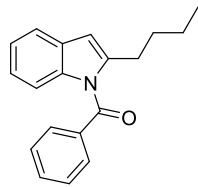

**3ha**  
101 MHz in CDCl<sub>3</sub>

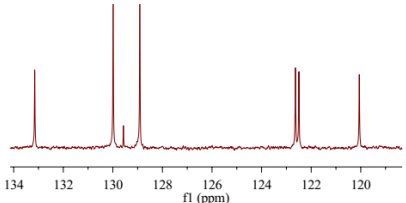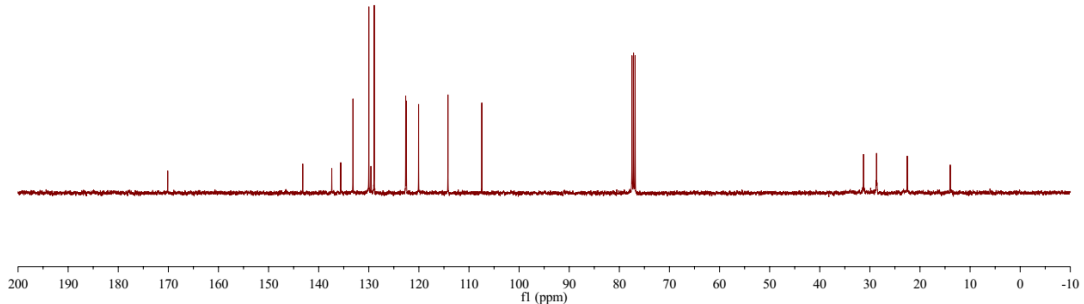

7.77  
7.75  
7.75  
7.61  
7.60  
7.51  
7.49  
7.47  
7.32  
7.30  
7.17  
7.17  
7.15  
7.12  
7.12  
6.39

1.86  
1.85  
1.84  
1.84  
1.82  
1.81  
1.81  
1.79  
0.75  
0.74  
0.73  
0.70  
0.70  
0.69  
0.69

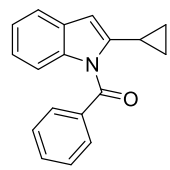

**3ia**  
400 MHz in CDCl<sub>3</sub>

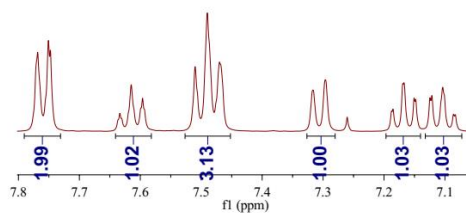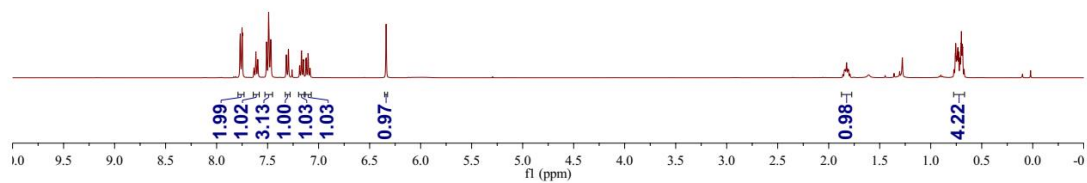

170.2  
144.3  
137.5  
136.0  
132.8  
129.9  
129.3  
128.7  
123.2  
122.8  
120.1  
114.4  
105.9

10.4  
8.5

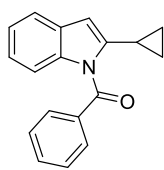

**3ia**  
101 MHz in CDCl<sub>3</sub>

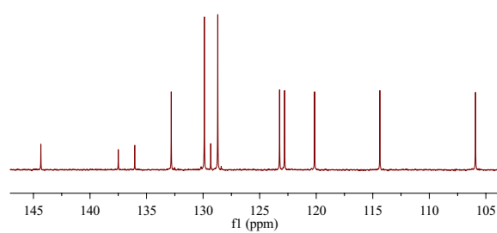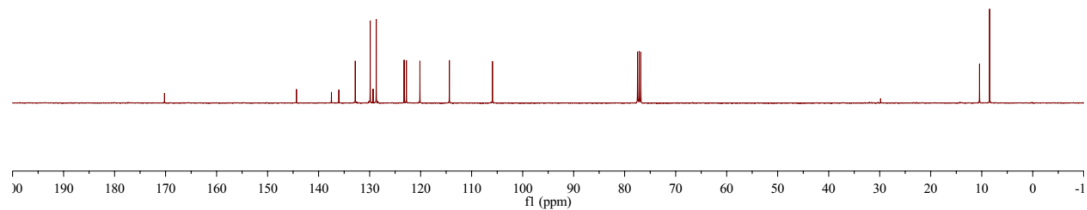

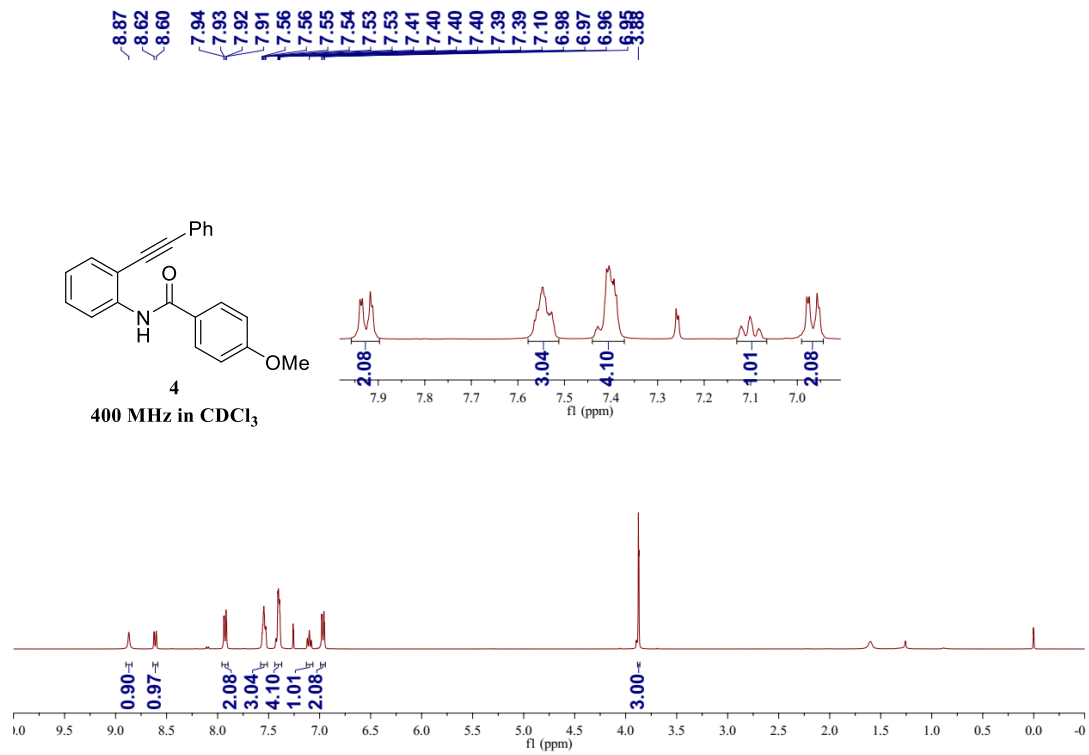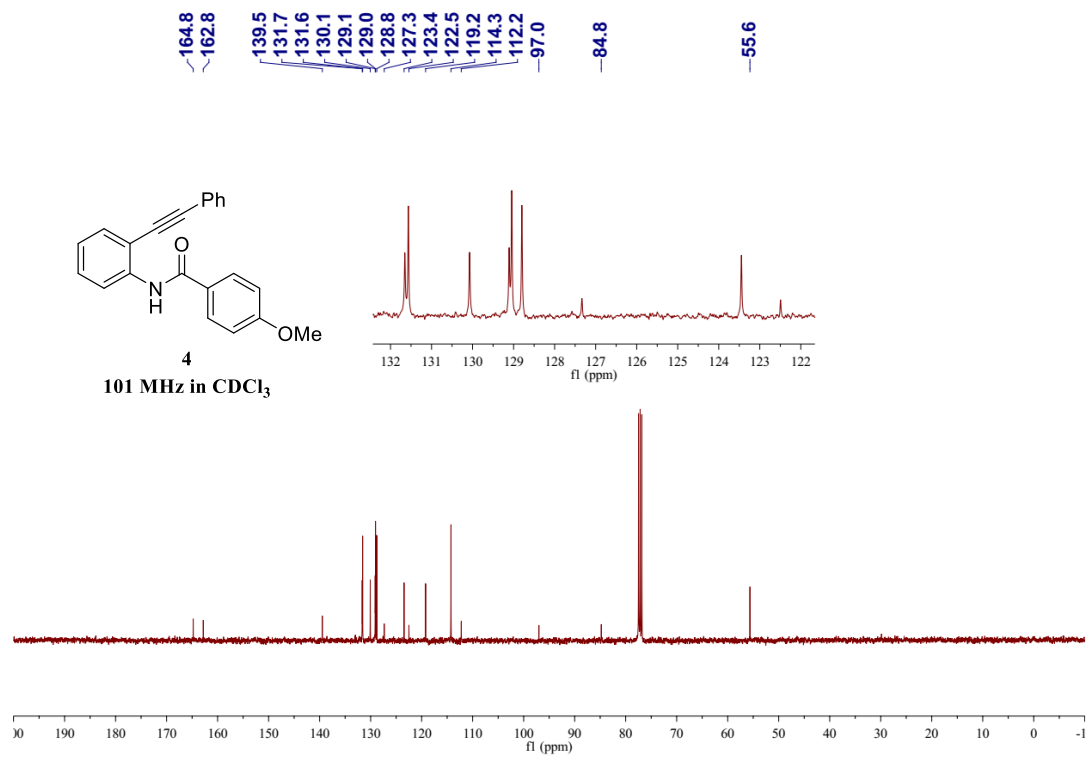

Supplement: d1qo01284c1.pdf [file d1qo01284c1.pdf]
